# Supplementary material for: Cohort study of diagnostic delay in the clinical pathway of patients with chronic wounds in the primary care setting
Source: PubMed Central journal article supplement — BMJ Open. 2022 Nov 21;12(11):e062673. doi: 10.1136/bmjopen-2022-062673 (PMC9680184; doi:10.1136/bmjopen-2022-062673), 2022-11-21
Supplement: bmjopen-2022-062673.draft_revisions.pdf [file bmjopen-2022-062673.draft_revisions.pdf]

# BMJ Open

BMJ Open is committed to open peer review. As part of this commitment we make the peer review history of every article we publish publicly available.

When an article is published we post the peer reviewers' comments and the authors' responses online. We also post the versions of the paper that were used during peer review. These are the versions that the peer review comments apply to.

The versions of the paper that follow are the versions that were submitted during the peer review process. They are not the versions of record or the final published versions. They should not be cited or distributed as the published version of this manuscript.

BMJ Open is an open access journal and the full, final, typeset and author-corrected version of record of the manuscript is available on our site with no access controls, subscription charges or pay-per-view fees (<http://bmjopen.bmj.com>).

If you have any questions on BMJ Open's open peer review process please email [info.bmjopen@bmj.com](mailto:info.bmjopen@bmj.com)

# BMJ Open

## A Cohort Study of Diagnostic Delay in the Clinical Pathway of Patients with Chronic Wounds in the Primary Care Setting

|                               |                                                                                                                                                                                                                                                                                                                                   |
|-------------------------------|-----------------------------------------------------------------------------------------------------------------------------------------------------------------------------------------------------------------------------------------------------------------------------------------------------------------------------------|
| Journal:                      | <i>BMJ Open</i>                                                                                                                                                                                                                                                                                                                   |
| Manuscript ID                 | bmjopen-2022-062673                                                                                                                                                                                                                                                                                                               |
| Article Type:                 | Original research                                                                                                                                                                                                                                                                                                                 |
| Date Submitted by the Author: | 16-Mar-2022                                                                                                                                                                                                                                                                                                                       |
| Complete List of Authors:     | Ahmajärvi, Kirsti; Helsinki University Central Hospital, Doctoral Programme in Populational Health and Department of General Practice and Primary Health Care<br>Isoherranen, K; Helsinki University Central Hospital, Dermatological Department<br>Venermo, M; Helsinki University Central Hospital, Vascular surgery Department |
| Keywords:                     | WOUND MANAGEMENT, VASCULAR SURGERY, Diabetic foot < DIABETES & ENDOCRINOLOGY, Health & safety < HEALTH SERVICES ADMINISTRATION & MANAGEMENT, Quality in health care < HEALTH SERVICES ADMINISTRATION & MANAGEMENT, PRIMARY CARE                                                                                                   |
|                               |                                                                                                                                                                                                                                                                                                                                   |

SCHOLARONE™  
Manuscripts

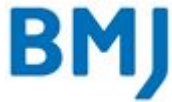

I, the Submitting Author has the right to grant and does grant on behalf of all authors of the Work (as defined in the below author licence), an exclusive licence and/or a non-exclusive licence for contributions from authors who are: i) UK Crown employees; ii) where BMJ has agreed a CC-BY licence shall apply, and/or iii) in accordance with the terms applicable for US Federal Government officers or employees acting as part of their official duties; on a worldwide, perpetual, irrevocable, royalty-free basis to BMJ Publishing Group Ltd ("BMJ") its licensees and where the relevant Journal is co-owned by BMJ to the co-owners of the Journal, to publish the Work in this journal and any other BMJ products and to exploit all rights, as set out in our [licence](#).

The Submitting Author accepts and understands that any supply made under these terms is made by BMJ to the Submitting Author unless you are acting as an employee on behalf of your employer or a postgraduate student of an affiliated institution which is paying any applicable article publishing charge ("APC") for Open Access articles. Where the Submitting Author wishes to make the Work available on an Open Access basis (and intends to pay the relevant APC), the terms of reuse of such Open Access shall be governed by a Creative Commons licence – details of these licences and which [Creative Commons](#) licence will apply to this Work are set out in our licence referred to above.

Other than as permitted in any relevant BMJ Author's Self Archiving Policies, I confirm this Work has not been accepted for publication elsewhere, is not being considered for publication elsewhere and does not duplicate material already published. I confirm all authors consent to publication of this Work and authorise the granting of this licence.

1  
2  
3 Title page  
4  
5  
6

7 A Cohort Study of Diagnostic Delay in the Clinical Pathway of Patients with Chronic Wounds in the  
8 Primary Care Setting  
9

10 Authors:  
11

- 12 1. Kirsti Ahmajärvi, MD, PhD Student, Specialist in General Practice, Special Competence in  
13 Wound Management
- 14 2. Kirsi Isoherranen, MD, PhD, Specialist in Dermatology and Allergology, Special Competence  
15 in Wound Management
- 16 3. Maarit Venermo, MD, PhD, Professor of Vascular Surgery  
17  
18

19 Address and position of each author:  
20

21 University of Helsinki, P.O. Box 4, 00014 University of Helsinki  
22

23  
24 1. K Ahmajärvi, MD, PhD Student, Specialist in General Practice, University of Helsinki, Doctoral  
25 Programme in Populational Health and Department of General Practice and Primary Health Care,  
26 University of Helsinki and Helsinki University Hospital, Helsinki, Finland. Helsinki University  
27 Hospital, P.O. Box 250, 00029 Helsinki  
28

29  
30 2. K Isoherranen, MD, PhD, Specialist of Dermatology and Allergology, Skin and Allergy Hospital,  
31 Meilahdentie 2, 00029 HUS, Finland.  
32

33 3. M Venermo, MD, PhD, Vascular Surgeon, Professor of Vascular Surgery, Head of the  
34 Department, University of Helsinki and Helsinki University Hospital, Helsinki, Finland  
35

36 Affiliations:  
37

38 1. K Ahmajärvi, MD, PhD Student, University of Helsinki, Doctoral Programme in Populational  
39 Health and Department of General Practice and Primary Health Care, University of Helsinki and  
40 Helsinki University Hospital, Helsinki, Finland  
41

42 2. K Isoherranen, MD, PhD, Department of Dermatology and allergology, University of Helsinki  
43 and Inflammation center, Helsinki University Hospital, Helsinki, Finland  
44

45 3. M Venermo, MD, PhD, Vascular Surgeon, Professor of Vascular Surgery, Head of the  
46 Department, University of Helsinki and Helsinki University Hospital, Helsinki, Finland  
47

48 Corresponding Author: Kirsti Ahmajärvi  
49

50 Correspondence to: [kirsti.ahmajarvi@helsinki.fi](mailto:kirsti.ahmajarvi@helsinki.fi)  
51

52 ORCID: Kirsti Ahmajärvi: <https://orcid.org/0000-0002-0253-2567>  
53

54 ORCID: Kirsi Isoherranen: <https://orcid.org/0000-0002-0253-2567>  
55

56 ORCID: Maarit Venermo: <https://orcid.org/>  
57  
58  
59  
60

1  
2  
3 Kirsti Ahmajärvi is the responsible guarantor of content and has contributed to the planning,  
4 conduct, and reporting of the work described in the article.  
5

6 Kirsi Isoherranen has contributed to the planning and reporting of the work described in this  
7 article.  
8

9 Maarit Venermo has contributed to the following parts in this study: Design of the study, data  
10 analysis and interpretation, revisions to scientific content of the manuscript, review and editing of  
11 the final manuscript.  
12  
13

14 The corresponding author attests that all listed authors meet authorship criteria and that no  
15 others meeting the criteria have been omitted.  
16

17 Authors disclose these three types of information:  
18

19  
20 *Associations with commercial entities that provided support for the work reported in the submitted*  
21 *manuscript (the timeframe for disclosure in this section of the form is the lifespan of the work*  
22 *being reported):*  
23

24 *Kirsti Ahmajärvi: Nothing to disclose*

25 *Kirsi Isoherranen: Nothing to disclose*

26 *Maarit Venermo: Nothing to disclose*

27 *Associations with commercial entities that could be viewed as having an interest in the general*  
28 *area of the submitted manuscript (in the three years before submission of the manuscript):*  
29

30 *Kirsti Ahmajärvi: Nothing to disclose*

31 *Kirsi Isoherranen: Nothing to disclose*

32 *Maarit Venermo: Nothing to disclose*

33 *Non-financial associations that may be relevant or seen as relevant to the submitted manuscript:*  
34

35 *Kirsti Ahmajärvi: Nothing to disclose*

36 *Kirsi Isoherranen: Nothing to disclose*

37 *Maarit Venermo: Nothing to disclose*  
38  
39

40 **No competing interests:** "All authors have completed the ICMJE uniform disclosure form  
41 at Helsinki and declare: no support from any organisation for the submitted work; no financial  
42 relationships with any organisations that might have an interest in the submitted work in the  
43 previous three years; no other relationships or activities that could appear to have influenced the  
44 submitted work."  
45

46 "The Corresponding Author has the right to grant on behalf of all authors and does grant on behalf  
47 of all authors to the Publishers and its licensees in perpetuity, in all forms, formats and media  
48 (whether known now or created in the future), to i) publish, reproduce, distribute, display and  
49 store the Contribution, ii) translate the Contribution into other languages, create adaptations,  
50 reprints, include within collections and create summaries, extracts and/or, abstracts of the  
51 Contribution, iii) create any other derivative work(s) based on the Contribution, iv) to exploit all  
52 subsidiary rights in the Contribution, v) the inclusion of electronic links from the Contribution to  
53 third party material where-ever it may be located; and, vi) licence any third party to do any or all  
54 of the above."  
55  
56  
57

58 This research received no specific grant from any funding agency in the public, commercial or not-  
59 for-profit sectors  
60

1  
2  
3 **Ethics:** Not applicable/No human participants included. This is a registry-based study, and we did  
4 not seek ethics committee approval.  
5

6 **Keywords:** chronic wound, leg ulcer, foot ulcer, wound management, wound aetiology, primary  
7 care, diagnostic process, diagnostic delay, clinical pathway  
8

9 **Words** 4632  
10  
11  
12  
13  
14  
15  
16  
17  
18  
19  
20  
21  
22  
23  
24  
25  
26  
27  
28  
29  
30  
31  
32  
33  
34  
35  
36  
37  
38  
39  
40  
41  
42  
43  
44  
45  
46  
47  
48  
49  
50  
51  
52  
53  
54  
55  
56  
57  
58  
59  
60

For peer review only

## Abstract

**Objectives:** Exact wound diagnosis is essential for successful wound management and a holistic care of the patient suffering from a wound. Wound management has been traditionally seen as a nursing area, but this can lead to considerable delays in wound diagnostics. A diagnostic delay has been recognised as an element of diagnostic error, which, in turn, affects patient safety. The aim of this cohort study was to examine diagnostic delays of chronic wound within primary care.

**Setting:** A specialised diagnostic unit, a wound care team, was established in the primary health care with the objective of reducing diagnostic and treatment delays in primary care.

**Participants:** The data consists of 197 consecutive patients attending their first appointment with the wound care team in 2016. The collected data included basic demographics, information about the clinical pathway, including doctor's appointments in primary and specialised care, as well as the ICD-10 diagnostic codes.

**Primary and secondary outcome measures:** The diagnostic delays were calculated in days and divided into three groups: 1) patient-related delay, 2) diagnostic delay and 3) organisational delay.

**Results:** The median duration of a patient-related delay was two days (IQR 0-14), whereas a physician's first evaluation was performed at a median of 8 (1-32) days from wound appearance and the correct diagnosis by the wound care team was established in a median of 57 (33-100) days. The organisational delay from first contact to diagnosis was a median of 41 (22-80) days. Only one in three patients had a diagnostic delay of less than 4 weeks.

**Conclusions:** According to this study, the diagnostic delay occurs within primary care, as an organisational delay from first contact to correct diagnosis. It is possible to arrange an optimal pathway of care in which a holistic wound care process starts within primary care.

## A COHORT STUDY OF DIAGNOSTIC DELAY IN THE CLINICAL PATHWAY OF PATIENTS WITH CHRONIC WOUNDS IN THE PRIMARY CARE SETTING

### Introduction

Chronic wounds pose a significant burden to health care, constituting roughly 2%–6% of all health care costs (1-3). According to a recent study in the UK, the annual prevalence of wounds increased by 71% between 2012/2013 and 2017/2018 and patient management costs increased by 48% in real terms (4). In addition to costs, chronic wounds cause substantial suffering at the individual level, leading to an impaired quality of life, social isolation and mental health problems (5-7). Wound management can be successful only when the wound is correctly diagnosed and treated accordingly (8,9). Wound care has been traditionally viewed as measures related to the assessment of the wound bed, which can obscure the importance of the holistic care of the patient (10).

In many European countries, wound patients are first seen in primary care by general practitioners (GPs) or nurses (11). This poses a significant challenge to primary care: wound patients should receive a timely evaluation by a qualified health care professional who can make the correct diagnosis, plan holistic treatment and make the necessary referrals (12). This process should aim to avoid diagnostic error, which has been recognised by the World Health Organization (WHO) as a global challenge to patient safety (13). Diagnostic error includes an incorrect or delayed diagnosis, which leads to patient harm or to inappropriate or delayed treatment. The diagnostic errors mainly occur within primary care or at the emergency department, where physicians lack the appropriate tools and sufficient time to make accurate decisions (14, 15).

In 2013, a special wound care team was established in the primary health care system of the Helsinki area. The wound care team consists of a wound care nurse and a general practitioner specialised in wound care. This team has the possibility to consult a podiatrist and/or vascular surgeon. Patients are referred to a wound care team consultation from all primary care units: health centres, home care units and nursing homes. The instructions for the primary care personnel were to react early and refer patients suffering from a non-healing wound within (2–)4 weeks of wound appearance in order to have the wound appropriately diagnosed. The main focus of the wound care team was to discover the correct diagnosis as early as possible and, thereafter, to initiate proper treatment accordingly.

The purpose of this study was to evaluate the delay in the diagnostic process in the clinical pathway of wound patients who were referred for a consultation by the wound care team during 2016. The delays were divided into system-related and patient-related delays.

### Material and methods



1  
2  
3 This prospective cohort study analysed the characteristics and medical history of 197 consecutive  
4 patients who visited the wound care team in primary health care during 2016. The information  
5 was collected at the first wound care team appointment.  
6

7  
8 Data were collected from electronic patient records. The collected data consisted of patients'  
9 background factors (sex, age, comorbidities, medication, previous wounds, state of mobility and  
10 living standards, need of home care, smoking, blood sugar levels and lipids), as well as the date of  
11 wound appearance, the date of the patient's first contact with a primary care unit and physician's  
12 appointment, the date of consulting the wound care team, and the date of admission to a  
13 specialist care unit if needed. In order to analyse the diagnostic process, additional information  
14 was collected on signs of infection and bacterial swab results, on whether the ankle brachial index  
15 (ABI) was measured or pulse palpation occurred, or whether neuropathy was detected with a  
16 monofilament test. Observations of oedema and any blood test analyses regarding the wound  
17 were also recorded. Furthermore, information was gathered from radiological examinations, if  
18 performed, as well as any further investigations within specialist care, such as toe pressure and  
19 angiography results. The treatment plan was evaluated and compared to the diagnostic methods  
20 and the ICD-10 code. (Supplementary Table 1)  
21  
22  
23  
24

25  
26 Delays were calculated at different points of the care pathway, starting from wound appearance.  
27 The different types of delays included: 1) patient-related delay (time from wound appearance to  
28 the patient's first contact with health care providers), 2) diagnostic delay (time from the onset of  
29 the wound to the first physician's appointment where the initial diagnosis was made), and 3)  
30 organisational delays within primary care in arriving at the correct diagnosis and treatment (from  
31 the first contact with the primary health care unit to the wound care team consultation). Some  
32 patients needed a referral to a specialist consultation, and this delay was also considered.  
33  
34

35  
36 Diagnostic codes were collected as ICD-10 codes and we compared to the diagnoses made by the  
37 primary care physician, by the wound care team physician and by the specialist. As the number of  
38 different diagnostic codes was high, we categorised the diagnoses into ten groups (Table 1, Figures  
39 1a and 1b). In the grouping process, we also included, in addition to the diagnostic code,  
40 information on how the wound had appeared and which diagnostic tools had been used to arrive  
41 at the specific conclusion and treatment plan.  
42  
43  
44  
45  
46  
47  
48  
49  
50  
51  
52  
53  
54  
55  
56  
57  
58  
59  
60

Table 1. Categorisation and diagnostic variation in the clinical pathway of a patient with a wound.

| Diagnostic categories               | Primary care physician (n = 129) | Wound care team physician (n = 197) | Specialist care physician (n = 110) |
|-------------------------------------|----------------------------------|-------------------------------------|-------------------------------------|
| No diagnosis*                       | 26                               | 2                                   | 1                                   |
| Arterial wound                      | 4                                | 16                                  | 26                                  |
| Venous or oedematous ulcer          | 15                               | 57                                  | 17                                  |
| Diabetic foot ulcer                 | 4                                | 24                                  | 15                                  |
| Pressure ulcer                      | 12                               | 29                                  | 9                                   |
| Post-traumatic wound                | 16                               | 23                                  | 3                                   |
| Atypical wound                      | 0                                | 8                                   | 7                                   |
| Mixed-aetiology ulcer               | 0                                | 7                                   | 3                                   |
| Infectious wound                    | 42                               | 11                                  | 10                                  |
| Foot malformation or pressure ulcer | 0                                | 7                                   | 1                                   |
| Wound of unspecified aetiology      | 36                               | 13                                  | 19                                  |

\*The category was defined as 'no diagnosis' when a patient had been seen by a physician but there was no ICD-10-coded diagnosis in the patient records.

1  
2  
3  
4  
5 In order to avoid bias caused by outliers, 16 patients whose wound had persisted for over 365  
6 days prior to the wound team consultation were excluded from the delay analysis.  
7

### 8 *Patient and public Involvement*

9

10 No patient or public involvement has been occurred in planning, managing, designing or carrying  
11 out this research.  
12  
13

### 14 **Results**

15

16 A total of 197 patients were included in the study. The mean age was 71 years, and 106 (53,5%)  
17 patients were female. The basic demographics and risk factors of the patients are reported in  
18 Tables 2-3.  
19  
20  
21  
22  
23  
24  
25  
26  
27  
28  
29  
30  
31  
32  
33  
34  
35  
36  
37  
38  
39  
40  
41  
42  
43  
44  
45  
46  
47  
48  
49  
50  
51  
52  
53  
54  
55  
56  
57  
58  
59  
60

Table 2. Basic demographics.

|                                  | Female(n) | %    | Male (n) | %    | Total (n) | %    |
|----------------------------------|-----------|------|----------|------|-----------|------|
| Sex                              | 106       | 53.8 | 91       | 46.2 | 197       | 100  |
| Age (y)                          |           |      |          |      |           |      |
| Mean                             | 78        | 39.6 | 69       | 33.7 | 147       | 36.0 |
| Median                           | 80        | 40.6 | 73       | 37.1 | 153       | 20.8 |
| Mobility (n)                     |           |      |          |      |           |      |
| walking                          | 38        | 19.3 | 56       | 28.4 | 94        | 47.7 |
| walking with assistance device   | 33        | 16.8 | 20       | 10.2 | 53        | 26.9 |
| walking with device only indoors | 16        | 8.1  | 5        | 2.5  | 21        | 10.7 |
| wheelchair                       | 11        | 5.6  | 8        | 4.1  | 19        | 9.6  |
| bedridden                        | 8         | 4.1  | 2        | 1.0  | 10        | 5.1  |
| Residence (n)                    |           |      |          |      |           |      |
| home                             | 57        | 28.9 | 73       | 37.1 | 130       | 66.0 |
| home with home care              | 30        | 15.2 | 12       | 6.1  | 42        | 21.3 |
| assisted living facility         | 14        | 7.1  | 5        | 2.5  | 19        | 9.6  |
| 24/7 care nursing home           | 5         | 2.5  | 1        | 0.5  | 6         | 3.0  |

Table 3 Description of the sample (n = 197, % of total) in individuals; comorbidities and risk factors.

| Comorbidities                         | Female (n) | %    | Male (n) | %    | Total (n) | %    | p-value*  |
|---------------------------------------|------------|------|----------|------|-----------|------|-----------|
| Hypertension                          | 60         | 30.5 | 50       | 25.4 | 110       | 55.8 |           |
| Heart failure                         | 25         | 12.7 | 11       | 5.6  | 36        | 18.3 | p = 0.044 |
| Ischaemic heart disease               | 13         | 6.6  | 10       | 5.1  | 23        | 11.7 |           |
| Atrial fibrillation                   | 37         | 18.8 | 24       | 12.2 | 61        | 31.0 |           |
| Respiratory condition                 | 27         | 13.7 | 11       | 5.6  | 38        | 19.3 |           |
| Cancer                                | 14         | 7.1  | 14       | 7.1  | 28        | 14.2 |           |
| Mental Health condition               | 9          | 4.6  | 9        | 4.6  | 18        | 9.1  |           |
| Dementia/memory disorder              | 25         | 12.7 | 9        | 4.6  | 34        | 17.3 | p = 0.013 |
| Diabetes                              | 30         | 15.2 | 47       | 23.9 | 77        | 39.1 | p < 0.001 |
| Peripheral arterial disease           | 16         | 8.1  | 24       | 12.2 | 40        | 20.3 | p = 0.042 |
| Kidney malfunction                    | 12         | 6.1  | 15       | 7.6  | 27        | 13.7 |           |
| Rheumatoid arthritis                  | 15         | 7.6  | 6        | 3.0  | 21        | 10.7 | p = 0.091 |
| Liver malfunction                     | 0          | 0.0  | 6        | 3.0  | 6         | 3.0  | p = 0.007 |
| Spinal stenosis                       | 5          | 2.5  | 3        | 1.5  | 8         | 4.1  |           |
| Gout                                  | 3          | 1.5  | 8        | 4.1  | 11        | 5.6  | p = 0.064 |
| Haematological condition              | 5          | 2.5  | 6        | 3.0  | 11        | 5.6  |           |
| Chronic pain disorder                 | 2          | 1.0  | 0        | 0.0  | 2         | 1.0  |           |
| Urinary condition                     | 4          | 2.0  | 10       | 5.1  | 14        | 7.1  | p = 0.045 |
| Cerebrovascular disorder              | 15         | 7.6  | 13       | 6.6  | 28        | 14.2 |           |
| Dermatological disease                | 3          | 1.5  | 2        | 1.0  | 5         | 2.5  |           |
| Musculoskeletal disorder              | 21         | 10.7 | 7        | 3.6  | 28        | 14.2 | p = 0.018 |
| No comorbidities                      | 3          | 1.5  | 4        | 2.0  | 7         | 3.6  |           |
| Risk factors                          | Female (n) | %    | Male (n) | %    | Total (n) | %    | p-value*  |
| Previous wounds                       | 46         | 23.4 | 50       | 25.4 | 96        | 48.7 |           |
| Previous DVT                          | 9          | 4.6  | 1        | 0.5  | 10        | 5.1  | p = 0.020 |
| venous insufficiency                  | 9          | 4.6  | 7        | 3.6  | 16        | 8.1  |           |
| chronic oedema                        | 3          | 1.5  | 2        | 1.0  | 5         | 2.5  |           |
| chronic cellulitis                    | 10         | 5.1  | 5        | 2.5  | 15        | 7.6  |           |
| previous amputation                   | 4          | 2.0  | 1        | 0.5  | 5         | 2.5  |           |
| Smoking (n)                           | 13         | 6.6  | 28       | 14.2 | 41        | 20.8 | p = 0.001 |
| Drug abuse                            | 2          | 1.0  | 5        | 2.5  | 7         | 3.6  | p = 0.010 |
| Alcohol abuse                         | 3          | 1.5  | 11       | 5.6  | 14        | 7.1  |           |
| Overweight (BMI 24–30)                | 59         | 29.9 | 62       | 31.5 | 121       | 61.4 |           |
| Obesity (BMI over 30)                 | 26         | 13.2 | 29       | 14.7 | 55        | 27.9 |           |
| High cholesterol (diagnosis)          | 22         | 11.2 | 23       | 11.7 | 45        | 22.8 |           |
| LDL over 3.0                          | 23         | 11.7 | 19       | 9.6  | 42        | 21.3 |           |
| Joint malformation                    | 8          | 4.1  | 3        | 1.5  | 11        | 5.6  | p = 0.010 |
| Neuropathy (diagnostic coded)         | 8          | 4.1  | 18       | 9.1  | 26        | 13.2 | p < 0.001 |
| Neuropathy (monofilament test posit.) | 32         | 16.2 | 54       | 27.4 | 86        | 43.7 |           |
| MRSA                                  | 2          | 1.0  | 6        | 3.0  | 8         | 4.1  | p = 0.048 |

|    |                   |            |     |            |     |                     |
|----|-------------------|------------|-----|------------|-----|---------------------|
| 1  |                   |            |     |            |     |                     |
| 2  |                   |            |     |            |     |                     |
| 3  | hemiplegia        | 2          | 1.0 | 2          | 1.0 | 4 2.0               |
| 4  | HbA1c(n=153)      |            |     |            |     |                     |
| 5  | Mean (SD)         | 43 (12.9)  |     | 49 (16.8)  |     | 46(15.1) p = 0.018~ |
| 6  | Median (IQR)      | 40         |     | 43         |     | 41(37 - 52)         |
| 7  | BMI(n=178)        |            |     |            |     |                     |
| 8  | Mean(SD)          | 27.4 (8.2) |     | 29.0 (6.2) |     | 28 (7.4)            |
| 9  | Median            | 26         |     | 28         |     | 26 (23 - 32)        |
| 10 | fP-Kol-LDL(n=169) |            |     |            |     |                     |
| 11 | Mean(SD)          | 2.5 (0.83) |     | 2.4 (0.86) |     | 2.5 (0.84)          |
| 12 | Median            | 2.4        |     | 2.3        |     | 2.4 (1.8-3.0)       |
| 13 | fP-Gluk(n=193)    |            |     |            |     |                     |
| 14 | Mean(SD)          | 6.0 (1.8)  |     | 7.3 (3.4)  |     | 6.6 (2.7) p = 00.1~ |
| 15 | Median            | 5.8        |     | 6.7        |     | 5.9 (5.3-6.9)       |

\*Pearsons chi-squared, difference between female and male patients

~One-way ANOVA test

1  
2  
3  
4  
5  
6  
7  
8  
9  
10  
11  
12  
13  
14  
15  
16  
17  
18  
19  
20  
21  
22  
23  
24  
25  
26  
27  
28  
29  
30  
31  
32  
33  
34  
35  
36  
37  
38  
39  
40  
41  
42  
43  
44  
45  
46  
47  
48  
49  
50  
51  
52  
53  
54  
55  
56  
57  
58  
59  
60

The majority of the patients were living at home (n = 172; 86.9%) either without any support (n = 130) or with home care (n = 42). The patients' living status is presented in Table 2. Almost half of the patients had had wounds earlier (48.7%). As regards comorbidities, 39.1% had diabetes, 11.7% ischemic heart disease, 17.3% memory disorders and 9.1% a mental health condition. Only 3.6% had no comorbidities. Overweight (61.4%), obesity (27.9%) and neuropathy (43.4%) were relatively common. Venous insufficiency or a previous deep venous thrombosis had been diagnosed in only 13.2%. As can be seen in Tables 3 and 4, the patients had several co-morbidities and heterogenous medications. Almost half of the patients used analgesics (44.7% NSAIDs or paracetamol and 15.2% opioids), whereas different psychopharmaceuticals were used by 11.7%–17.8% of the patients.

For peer review only

Table 4. Description of the sample (n = 197) in individuals; medication.

| Medication                         | Female (n) | %    | Male (n) | %    | Total (n) | %    | chi-square |
|------------------------------------|------------|------|----------|------|-----------|------|------------|
| <b>Cardiac and vessel medicine</b> |            |      |          |      |           |      |            |
| Anticoagulant                      | 41         | 20.8 | 26       | 13.2 | 67        | 34.0 | p = 0.164  |
| Antithrombotic                     | 29         | 14.7 | 28       | 14.2 | 57        | 28.9 |            |
| b-blocker                          | 57         | 28.9 | 41       | 20.8 | 98        | 49.7 | p = 0.018  |
| Diuretic                           | 45         | 22.8 | 32       | 16.2 | 77        | 39.1 |            |
| Ca-blocker                         | 27         | 13.7 | 31       | 15.7 | 58        | 29.4 |            |
| ACE-blocker                        | 38         | 19.3 | 47       | 23.9 | 85        | 43.1 |            |
| Statin                             | 40         | 20.3 | 35       | 17.8 | 75        | 38.1 |            |
| <b>Diabetes medicine</b>           |            |      |          |      |           |      |            |
| Oral diabetes medicine             | 16         | 8.1  | 21       | 10.7 | 37        | 18.8 | p = 0.134  |
| Insulin                            | 12         | 6.1  | 30       | 15.2 | 42        | 21.3 | p < 0.001  |
| <b>Psychopharmaceuticals</b>       |            |      |          |      |           |      |            |
| Dementia medicine                  | 16         | 8.1  | 6        | 3.0  | 22        | 11.2 | p = 0.066  |
| Antidepressant                     | 14         | 7.1  | 11       | 5.6  | 25        | 12.7 |            |
| Benzodiazepine                     | 13         | 6.6  | 10       | 5.1  | 23        | 11.7 | p = 0.135  |
| Sleeping pills                     | 23         | 11.7 | 12       | 6.1  | 35        | 17.8 |            |
| Analgesia(mild)                    | 57         | 28.9 | 31       | 15.7 | 88        | 44.7 | p = 0.008  |
| Opiates                            | 18         | 9.1  | 12       | 6.1  | 30        | 15.2 |            |
| <b>Immune system medicine</b>      |            |      |          |      |           |      |            |
| Cancer medicine                    | 2          | 1.0  | 3        | 1.5  | 5         | 2.5  | p = 0.124  |
| Immunosuppressive                  | 11         | 5.6  | 4        | 2.0  | 15        | 7.6  |            |
| Cortisone per oral                 | 12         | 6.1  | 4        | 2.0  | 16        | 8.1  | p = 0.083  |
| Cortisone cream                    | 4          | 2.0  | 0        | 0.0  | 4         | 2.0  | p = 0.064  |
| <b>Supplements</b>                 |            |      |          |      |           |      |            |
| Thyroxin                           | 16         | 8.1  | 3        | 1.5  | 19        | 9.6  | p = 0.006  |
| Ca-supplement                      | 46         | 23.4 | 16       | 8.1  | 62        | 31.5 | p < 0.001  |
| Folic acid                         | 7          | 3.6  | 3        | 1.5  | 10        | 5.1  |            |
| B12-supplement                     | 11         | 5.6  | 12       | 6.1  | 23        | 11.7 | p = 0.013  |
| Vitamin D suppl.                   | 44         | 22.3 | 22       | 11.2 | 66        | 33.5 |            |
| Nutrition suppl.                   | 6          | 3.0  | 2        | 1.0  | 8         | 4.1  |            |
| Mg suppl.                          | 7          | 3.6  | 4        | 2.0  | 11        | 5.6  |            |
| K suppl.                           | 11         | 5.6  | 9        | 4.6  | 20        | 10.2 |            |
| <b>Other</b>                       |            |      |          |      |           |      |            |
| Inhaler/nebulizer                  | 26         | 13.2 | 16       | 8.1  | 42        | 21.3 | p = 0.030  |
| Proton pump inhibitor              | 39         | 19.8 | 20       | 10.2 | 59        | 29.9 |            |
| Urine medicine                     | 8          | 4.1  | 12       | 6.1  | 20        | 10.2 | p = 0.190  |
| Skin cream                         | 19         | 9.6  | 10       | 5.1  | 20        | 10.2 |            |



## Diagnostics

Forty-two (21.3%) patients were not seen by a primary care physician before they visited the wound care team, meaning that the diagnostic process was not even started before this visit. Of the 155 patients who had been seen by a physician prior to the wound care team, 129 (83.2%) had a recorded diagnosis code (ICD-10), while 26 (16.8%) patients remained undiagnosed. Thus, 34.5% of the patients (n = 68) received their first diagnosis by the wound care team.

Out of the patients who were seen by a primary care physician, 85 (58.8%) had no delay (median 0 days), meaning that the patients visited an emergency room and were seen by a physician immediately. The diagnoses for these patients mainly comprised infectious wounds (n = 30, 35.3%) and wounds with no specific cause (n = 21, 24.7%), while a diagnostic code was not recorded for 10.6% (n = 9). Hence, 15 patients had traumatic wounds and saw the physician at an acute appointment.

Of those patients who saw a primary care physician (n = 155), 36.2% (n = 56) had clinical signs of infection according to the patient records. However, as many as 94 (60.6%) patients were treated with antibiotics, and 82 (52.9%) had a bacterial swab taken.

Of the 129 patients who had a diagnosis before the first appointment with the wound care team, the same diagnosis was made by the team and the primary care physician in 59 (45.7%) of the cases. The concordant diagnoses most often entailed pressure ulcers, infectious ulcers, as well as venous and post-traumatic ulcers. Specialist care was received by 111(%) patients. The same diagnosis (ICD-10) was made by all three points in the clinical pathway in only 24 (12.2%) cases, and the majority of these comprised infectious ulcers, followed by a venous aetiology and wounds without a specific diagnosis. (Table 5.)

Table 5. Differentiation of the diagnoses when they remained unchanged or were revised over the clinical pathway.

| Categorised diagnostic groups       | Diagnoses that remained unchanged... |                                        |                                        | Diagnoses that were revised.       |                                       |
|-------------------------------------|--------------------------------------|----------------------------------------|----------------------------------------|------------------------------------|---------------------------------------|
|                                     | within primary care                  | throughout the entire clinical pathway | by wound care team and specialist care | Primary care physician's diagnosis | Wound care team physician's diagnosis |
| Arterial wound                      | 0                                    | 0                                      | 16                                     | 4                                  | 7                                     |
| Venous or oedematous ulcer          | 13                                   | 5                                      | 17                                     | 2                                  | 24                                    |
| Diabetic foot ulcer                 | 2                                    | 1                                      | 13                                     | 2                                  | 11                                    |
| Pressure ulcer                      | 11                                   | 3                                      | 9                                      | 1                                  | 8                                     |
| Post-traumatic wound                | 15                                   | 3                                      | 3                                      | 0                                  | 2                                     |
| Atypical wound                      | 0                                    | 0                                      | 7                                      | 0                                  | 4                                     |
| Mixed-aetiology wound               | 0                                    | 0                                      | 2                                      | 0                                  | 3                                     |
| Infectious wound                    | 10                                   | 8                                      | 9                                      | 32                                 | 1                                     |
| Foot malformation or pressure ulcer | 0                                    | 0                                      | 1                                      | 0                                  | 5                                     |
| Wound of unspecified aetiology      | 8                                    | 4                                      | 6                                      | 27                                 | 3                                     |

1  
2  
3  
4  
5  
6  
7  
8  
9  
10  
11  
12  
13  
14  
15  
16  
17  
18  
19  
20  
21  
22  
23  
24  
25  
26  
27  
28  
29  
30  
31  
32  
33  
34  
35  
36  
37  
38  
39  
40  
41  
42  
43  
44  
45  
46  
47  
48  
49  
50  
51  
52  
53  
54  
55  
56  
57  
58  
59  
60

Of the patients who visited a specialist, the same diagnosis was made by the wound care team physician and the specialist in 75.5% of the cases (Table 5 and 6). The concordant diagnoses most often comprised diabetic foot ulcers (20.5%), arterial ulcers (19.3%) and venous or oedematous ulcers (15.7%). In the remaining 24.6% (n = 27) of the patients, the diagnosis made by the wound care team was revised in specialist care, mostly comprising arterial ulcers (40.7%) that were usually referred for further investigations with a suspicion of an arterial wound. The ulcers that turned out to be arterial wounds were diagnosed by the wound care team as diabetic foot ulcers (14.8%), wounds of mixed aetiology (18.5%), foot malformations (14.8%) and oedematous ulcers (37.0%).

Post-traumatic wounds were categorised into one category. In the primary care setting, there were 16 post-traumatic ulcers, 15 of which were assessed in the emergency room (ER).

Table 6. Diagnostic differentiation through the treatment pathway.

|                           | The same diagnosis~<br>throughout entire<br>treatment pathway | The same diagnosis<br>within primary care~~ | The same diagnosis by<br>wound care team and<br>specialist |
|---------------------------|---------------------------------------------------------------|---------------------------------------------|------------------------------------------------------------|
| 1 = the same              | 24                                                            | 60                                          | 83                                                         |
| 0 = different             | 47                                                            | 67                                          | 27                                                         |
| total                     | 71                                                            | 127                                         | 110                                                        |
| % of diagnosed*^ patients | 21,8                                                          | 47,6                                        | 75,5                                                       |
| % of 197 (whole sample)   | 12,2                                                          | 30,5                                        | 42,1                                                       |

~ treatment pathway: primary care physician, wound care team (physician) and specialist care.

~~primary care physician and wound care team (physician)

\*155 patients visited a doctor in primary care before the appointment with the wound care team, but only 126 patients were diagnosed.

^110 patients were diagnosed in specialist care.

## Delays

The median time from wound appearance to the first health care contact was 2 days (IQR 0–14 days, range 0–351 days) and from wound appearance to the first evaluation by a physician 8 days (IQR 1–32 days, range 0–314 days). The majority of the patients had their first health care contact at the emergency department where a physician also examined the patient, or at the district nurse's office at a health centre with the possibility of an immediate physician's consultation. The median time from the onset of the wound to the first wound care team appointment was 57 days (IQR 33–100 days, range 2–358 days). The median time between the first health care contact and the wound care team appointment was 41 days (IQR 22–80 days: range 1–484 days). Only one in three patients (n = 61) had an organisational delay of less than 4 weeks between the first contact with health services and the appointment with the wound care team.

Half of the patients (n = 113, 57.4%) were referred to a secondary health care unit to be seen by a specialist, most often by a vascular surgeon (n = 67), followed by a plastic surgeon (n = 43) and a dermatologist (n = 13). Twenty-one (18.6%) patients were referred to two or more specialists. The median delay from the first appointment with the wound care team to the appointment with the secondary health care specialist was 21 days (IQR 8–55, min–max -58–235; range 293 days).

The median time from the appearance of the wound to the final diagnosis was 57 days (IQR 33–101; min–max 2–358; range 356 days).

The delays in different the subgroups are presented in Table 7.

Table 7. Delays in different subgroups. Figures are presented as medians (IQR; Min–Max; Range)

Delays are calculated and analysed with the inclusion criterion 'wound appearance within 365 days prior to wound care team appointment'.

|                                            | n   | Wound appearance - first contact to health care | Wound appearance to first physician evaluation | Wound appearance to wound care team | Delay from first contact to wound care team (organizational delay within primary care) | Delay Wound care team to specialist care | Mann-Whitney-U            |
|--------------------------------------------|-----|-------------------------------------------------|------------------------------------------------|-------------------------------------|----------------------------------------------------------------------------------------|------------------------------------------|---------------------------|
| All patients                               | 182 | 2 (0–14;0–351;351)                              | 8(1–32;0–314;314)                              | 57(33–101;2–358;356)                | 42(22–80;1–484;483)                                                                    | 21(7–52;-58–252;414)                     |                           |
| Male                                       | 81  | 3 (0–24;0–351;351)                              | 9(1–37;0–314;314)                              | 69(37–111;2–358;356)*               | 44(23–85;2–484;482)                                                                    | 23(3–48;-58–235;293)                     | *p = 0.058                |
| Female                                     | 101 | 1 (0–8;0–295;295)                               | 8(1–24;0–295;295)                              | 54(30–96;2–306;304)*                | 41(22–76;1–264;263)                                                                    | 20(8–58;0–176;176)                       |                           |
| Age under 65 y (1)                         | 46  | 6 (1–27;0–298;298)*                             | 9(3–30;0–142;142)                              | 62(36–100;11–320;309)               | 37(22–76;6–382;376)                                                                    | 28(14–48;1–182;181)                      | *1 vs 2; p = 0.005        |
| Age 65–80 y (2)                            | 62  | 0 (0–14;0–258;258)*                             | 10(0–38;0–314;314)                             | 61(41–106;10–337;327)               | 49(25–88;4–264;260)                                                                    | 16(2–50;0–235;235)                       | *1 vs 3; p = 0.003        |
| Age over 80 y (3)                          | 74  | 1 (0–8;0–351;351)*                              | 7(1–32;0–295;295)                              | 53,5(30–98;2–358;356)               | 40(22–78;1–484;483)                                                                    | 16(6–56;-58–167;225)                     |                           |
| DM+                                        | 72  | 1 (0–15;0–142;142)                              | 10(1–37;0–142;142)                             | 59(36–102;2–324;322)                | 45(26–75;2–245;243)                                                                    | 14(3–48;0–235;235)                       | no statistical difference |
| DM-                                        | 110 | 2 (0–13;0–351;351)                              | 7(1–32;0–314;314)                              | 56(31–101;4–358;354)                | 40(22–84;1–482;483)                                                                    | 26(8–56;-58–167;225)                     |                           |
| Living at home                             | 160 | 2 (0–15;0–351;351)                              | 9(1–33;0–314;314)                              | 57(33–102;2–358;356)                | 42(22–83;1–382;381)                                                                    | 20(5–48;0–235;235)*                      | *p = 0.010                |
| Living in institution                      | 22  | 1 (0–8;0–295;295)                               | 3(0–14;0–295;295)                              | 55(34–86;7–306;299)                 | 43(24–72;7–484;477)                                                                    | 56(16–143;-58–176;234)*                  |                           |
| Walking; outdoors                          | 134 | 3 (0–15;0–351;351)*                             | 8(1–27;0–246;246)                              | 56(33–97;4–358;354)                 | 40(22–76;1–382;381)                                                                    | 22(6–56;-58–235;293)                     | *p = 0.047                |
| Not-walking; staying indoors               | 48  | 0 (0–5;0–298;298)                               | 9(1–55;0–314;314)                              | 71(33–108;2–337;335)                | 54(24–94;2–484;482)                                                                    | 16(7–46;0–182;182)                       |                           |
| Delay before wound care team under 28 days | 61  | 6 (0–20;0–351;351)*                             | 7(3–24;0–295;295)                              | 26(19–41;2–358;356)*                | 18(12–22;1–28;27)                                                                      | 22(4–42;0–167;167)                       | *p < 0.001                |
| Delay before wound care team over 28 days  | 121 | 0 (0–8;0–258;258)                               | 9(0–34;0–314;314)                              | 73(51–112;29–337;308)               | 70(42–101;29–484;455)                                                                  | 20(7–55;-58–235;293)                     |                           |
| Unchanged diagnosis (PC–WT–spec.)          | 20  | 3 (2–12;0–246;246)                              | 7(3–19;0–246;246)                              | 51(32–80;5–267;262)                 | 35(20–74;2–186;184)                                                                    | 23(8–45;0–89;89)                         |                           |
| Different diagnosis                        | 43  | 1 (0–17;0–258;258)                              | 8(0–42;0–314;314)                              | 71(37–111;4–337;333)                | 57(30–89;1–245;244)                                                                    | 18(7–98;0–235;235)                       |                           |
| The same DG within primary care            | 55  | 2 (0–7;0–246;246)                               | 3(1–18;0–246;246)                              | 52(31–78;5–267;262)*                | 40(20–71;2–186;184)                                                                    | 33(9–56;0–176;176)                       | *p=0.042                  |
| Different DG                               | 61  | 1 (0–24;0–258;258)                              | 17(1–56;0–314;314)                             | 73(37–126;4–337;333)                | 53(31–98;1–245;244)                                                                    | 15(7–64;0–235;235)                       |                           |

1  
2  
3  
4  
5  
6  
7  
8  
9  
10  
11  
12  
13  
14  
15  
16  
17  
18  
19  
20  
21  
22  
23  
24  
25  
26  
27  
28  
29  
30  
31  
32  
33  
34  
35  
36  
37  
38  
39  
40  
41  
42  
43  
44  
45  
46  
47  
48  
49  
50  
51  
52  
53  
54  
55  
56  
57  
58  
59  
60

For peer review only

**Discussion**

It is well-known that an early diagnosis of the underlying cause of a chronic wound is essential for wound healing and for avoiding amputations (8, 16, 17). However, there are only a few studies

1  
2  
3 describing the importance of wound diagnosis and the deleterious effects of diagnostic delays (18-  
4 20). In the current study, we investigated the diagnostic processes and delays in wound care in the  
5 Helsinki area. The patients' first contact with health care services after wound appearance was  
6 prompt, the median delay being only 2 days. In stark contrast, it took 57 days from the appearance  
7 of the wound before the patient was seen by the wound care team for the first time. In our  
8 material, only 31.0% of the patients visited the wound care team within 4 weeks of the first health  
9 care appointment. This caused a significant delay in reaching the correct diagnosis of the wound.  
10 We also discovered that only 65.5% of all patients had a recorded wound diagnosis before the first  
11 wound care team appointment and that this diagnosis matched the final diagnosis in  
12 approximately 50% of the cases. Accordingly, in European countries, the delay in diagnosing  
13 diabetic foot ulcers (DFU) was over 3 weeks in 21%–34% of the patients. The shortest average  
14 time from event to diagnosis was 10 days in the UK, 14 days in Spain and France, and 20 days in  
15 Germany. (12)

16  
17  
18  
19  
20  
21 In Finland, wound patients are evaluated and treated mainly during primary care appointments,  
22 including home care and nursery homes (21). In the mentioned European countries, the health  
23 care professionals who participate in the diagnostic process vary considerably. In the UK, only 6%  
24 of GPs completely agreed that the care and management of DFUs is the GP's responsibility, and  
25 22% did not diagnose DFUs. Instead, in 27% of the cases, district nurses made the diagnosis. In the  
26 UK, the approach seems more often to be multidisciplinary, as 49% of the GPs referred patients to  
27 a podiatrist if needed. In all four countries, GPs were able to refer DFU patients to specialised  
28 multidisciplinary clinics. (22)

29  
30  
31  
32 In the UK, DFUs were diagnosed by a GP in only 45% of the cases, and most of the wounds were  
33 diagnosed by a district nurse or practice nurse (12).

34  
35  
36  
37  
38  
39 The optimal treatment pathways for wound patients include patient surveillance and an early  
40 detection of wound healing problems. Errors in the pathway may lead to delays and,  
41 consequently, even fatal errors, such as amputations, in some patients. (17)

42  
43  
44  
45  
46  
47  
48  
49  
50  
51  
52  
53  
54  
55  
56 We took a closer look at the ICD-10 codes assessed by the primary care physicians, wound care  
57 team physician and specialists and found that they differed from each other significantly. This  
58 highlights the complexity of wound diagnostics. Surprisingly, only 12.2% of the patients had the  
59 same diagnosis throughout the whole pathway of care, and these mostly comprised infectious  
60 wounds. Based on our data, we assume that there was a significant overdiagnosis of infections in  
primary care, since an infectious wound was diagnosed in 32.6% of the cases and antibiotics were  
prescribed for 63.2% of the patients in the primary care setting. Similar results have been obtained  
in Sweden, where the use of a national wound register diminished the use of antibiotics (24).  
Evidence of difficulties in the diagnostics of wound infections is also found in a study of GPs  
recognising and treating wound infections – according to the results, GPs mostly desired further  
knowledge about when to start or stop treatment (81%–82%), about topical antimicrobials (80%–  
68%) and about when to prescribe antibiotics (82%–95%) (24).

57  
58  
59  
60  
61  
62  
63  
64  
65  
66  
67  
68  
69  
70  
71  
72  
73  
74  
75  
76  
77  
78  
79  
80  
81  
82  
83  
84  
85  
86  
87  
88  
89  
90  
91  
92  
93  
94  
95  
96  
97  
98  
99  
100  
101  
102  
103  
104  
105  
106  
107  
108  
109  
110  
111  
112  
113  
114  
115  
116  
117  
118  
119  
120  
121  
122  
123  
124  
125  
126  
127  
128  
129  
130  
131  
132  
133  
134  
135  
136  
137  
138  
139  
140  
141  
142  
143  
144  
145  
146  
147  
148  
149  
150  
151  
152  
153  
154  
155  
156  
157  
158  
159  
160  
161  
162  
163  
164  
165  
166  
167  
168  
169  
170  
171  
172  
173  
174  
175  
176  
177  
178  
179  
180  
181  
182  
183  
184  
185  
186  
187  
188  
189  
190  
191  
192  
193  
194  
195  
196  
197  
198  
199  
200  
201  
202  
203  
204  
205  
206  
207  
208  
209  
210  
211  
212  
213  
214  
215  
216  
217  
218  
219  
220  
221  
222  
223  
224  
225  
226  
227  
228  
229  
230  
231  
232  
233  
234  
235  
236  
237  
238  
239  
240  
241  
242  
243  
244  
245  
246  
247  
248  
249  
250  
251  
252  
253  
254  
255  
256  
257  
258  
259  
260  
261  
262  
263  
264  
265  
266  
267  
268  
269  
270  
271  
272  
273  
274  
275  
276  
277  
278  
279  
280  
281  
282  
283  
284  
285  
286  
287  
288  
289  
290  
291  
292  
293  
294  
295  
296  
297  
298  
299  
300  
301  
302  
303  
304  
305  
306  
307  
308  
309  
310  
311  
312  
313  
314  
315  
316  
317  
318  
319  
320  
321  
322  
323  
324  
325  
326  
327  
328  
329  
330  
331  
332  
333  
334  
335  
336  
337  
338  
339  
340  
341  
342  
343  
344  
345  
346  
347  
348  
349  
350  
351  
352  
353  
354  
355  
356  
357  
358  
359  
360  
361  
362  
363  
364  
365  
366  
367  
368  
369  
370  
371  
372  
373  
374  
375  
376  
377  
378  
379  
380  
381  
382  
383  
384  
385  
386  
387  
388  
389  
390  
391  
392  
393  
394  
395  
396  
397  
398  
399  
400  
401  
402  
403  
404  
405  
406  
407  
408  
409  
410  
411  
412  
413  
414  
415  
416  
417  
418  
419  
420  
421  
422  
423  
424  
425  
426  
427  
428  
429  
430  
431  
432  
433  
434  
435  
436  
437  
438  
439  
440  
441  
442  
443  
444  
445  
446  
447  
448  
449  
450  
451  
452  
453  
454  
455  
456  
457  
458  
459  
460  
461  
462  
463  
464  
465  
466  
467  
468  
469  
470  
471  
472  
473  
474  
475  
476  
477  
478  
479  
480  
481  
482  
483  
484  
485  
486  
487  
488  
489  
490  
491  
492  
493  
494  
495  
496  
497  
498  
499  
500  
501  
502  
503  
504  
505  
506  
507  
508  
509  
510  
511  
512  
513  
514  
515  
516  
517  
518  
519  
520  
521  
522  
523  
524  
525  
526  
527  
528  
529  
530  
531  
532  
533  
534  
535  
536  
537  
538  
539  
540  
541  
542  
543  
544  
545  
546  
547  
548  
549  
550  
551  
552  
553  
554  
555  
556  
557  
558  
559  
560  
561  
562  
563  
564  
565  
566  
567  
568  
569  
570  
571  
572  
573  
574  
575  
576  
577  
578  
579  
580  
581  
582  
583  
584  
585  
586  
587  
588  
589  
590  
591  
592  
593  
594  
595  
596  
597  
598  
599  
600  
601  
602  
603  
604  
605  
606  
607  
608  
609  
610  
611  
612  
613  
614  
615  
616  
617  
618  
619  
620  
621  
622  
623  
624  
625  
626  
627  
628  
629  
630  
631  
632  
633  
634  
635  
636  
637  
638  
639  
640  
641  
642  
643  
644  
645  
646  
647  
648  
649  
650  
651  
652  
653  
654  
655  
656  
657  
658  
659  
660  
661  
662  
663  
664  
665  
666  
667  
668  
669  
670  
671  
672  
673  
674  
675  
676  
677  
678  
679  
680  
681  
682  
683  
684  
685  
686  
687  
688  
689  
690  
691  
692  
693  
694  
695  
696  
697  
698  
699  
700  
701  
702  
703  
704  
705  
706  
707  
708  
709  
710  
711  
712  
713  
714  
715  
716  
717  
718  
719  
720  
721  
722  
723  
724  
725  
726  
727  
728  
729  
730  
731  
732  
733  
734  
735  
736  
737  
738  
739  
740  
741  
742  
743  
744  
745  
746  
747  
748  
749  
750  
751  
752  
753  
754  
755  
756  
757  
758  
759  
760  
761  
762  
763  
764  
765  
766  
767  
768  
769  
770  
771  
772  
773  
774  
775  
776  
777  
778  
779  
780  
781  
782  
783  
784  
785  
786  
787  
788  
789  
790  
791  
792  
793  
794  
795  
796  
797  
798  
799  
800  
801  
802  
803  
804  
805  
806  
807  
808  
809  
810  
811  
812  
813  
814  
815  
816  
817  
818  
819  
820  
821  
822  
823  
824  
825  
826  
827  
828  
829  
830  
831  
832  
833  
834  
835  
836  
837  
838  
839  
840  
841  
842  
843  
844  
845  
846  
847  
848  
849  
850  
851  
852  
853  
854  
855  
856  
857  
858  
859  
860  
861  
862  
863  
864  
865  
866  
867  
868  
869  
870  
871  
872  
873  
874  
875  
876  
877  
878  
879  
880  
881  
882  
883  
884  
885  
886  
887  
888  
889  
890  
891  
892  
893  
894  
895  
896  
897  
898  
899  
900  
901  
902  
903  
904  
905  
906  
907  
908  
909  
910  
911  
912  
913  
914  
915  
916  
917  
918  
919  
920  
921  
922  
923  
924  
925  
926  
927  
928  
929  
930  
931  
932  
933  
934  
935  
936  
937  
938  
939  
940  
941  
942  
943  
944  
945  
946  
947  
948  
949  
950  
951  
952  
953  
954  
955  
956  
957  
958  
959  
960  
961  
962  
963  
964  
965  
966  
967  
968  
969  
970  
971  
972  
973  
974  
975  
976  
977  
978  
979  
980  
981  
982  
983  
984  
985  
986  
987  
988  
989  
990  
991  
992  
993  
994  
995  
996  
997  
998  
999  
1000



1  
2  
3 when an ischaemic wound was suspected. This problem is also detected in a multi-centre study  
4 performed in four European countries. The researchers found that, even though GPs described  
5 neuropathy and peripheral arterial disease as cofactors in the DFU development, they investigated  
6 DFUs with additional tests in only half of the cases; this entailed monofilament tests in 21%–43%  
7 and, more often, pulse palpation or the measurement of the ankle brachial index in 78%–90% of  
8 the cases, but diabetic foot infection (DFI) was tested in only 7%–20% of the investigated cases.  
9  
10  
11 (11)

12  
13 Our main finding was that there was an organisational delay in reaching a timely diagnosis. The  
14 time between wound appearance and the first contact with a physician was adequate, the median  
15 being 8 days, and two-thirds (58.8%, n = 85) of the patients had their first evaluation at the first  
16 contact with health services. This means that a physician's examination was mostly available at the  
17 emergency room or as a rapid consultation during a nurse's appointment at the health centre.  
18 However, our study shows that, among these patients, the initial physician's evaluation very  
19 seldom leads to a correct diagnosis and treatment.  
20  
21  
22

23 Regarding wound patients, emergency room assessment should include the three most important  
24 and acute aetiologies, such as infection, ischaemia and diabetes (25), but otherwise the  
25 emergency room might not be the optimal setting for diagnosing wounds.  
26  
27

28 Post-traumatic ulcers could be a subgroup of oedematous leg ulcers due to the same management  
29 approach, namely compression therapy, which should be assessed immediately after  
30 vascular/arterial causes have been ruled out. Hence, according to the present data, oedematous  
31 and post-traumatic ulcers accounted for 40.6% of all the ulcers and were treated with  
32 compression.  
33  
34

35 We found that the wound diagnostic process was good enough in the wound care team, as the  
36 diagnosis did not change for 75.5% of the patients who were referred by the team to specialist  
37 care. In the remaining 24.5%, in whom the diagnosis made by a specialist differed from the  
38 diagnosis made by the wound care team, the final diagnosis was confirmed using diagnostic tools  
39 that were not available in the health centre. In these cases, however, the wound care team often  
40 had a default diagnosis to base the referral on, and specialist care then responded to this idea,  
41 most often leading to the correct treatment. Indeed, the referral was very useful for these  
42 patients.  
43  
44  
45

46 On the other hand, there were ordinary delays in receiving a specialist evaluation, as the median  
47 delay was 21 days, where the largest differences were between the subgroups of patients living in  
48 institutions and those living at home. This might be explained by the advance care planning among  
49 nursing home residents. However, previous studies propose delays of less than two weeks in  
50 diagnosing arterial ulcers and DFUs to avoid leg losses (17).  
51  
52

53 Previous studies suggest that diagnostic errors are often preceded by common symptoms,  
54 followed by common diagnoses (26, 27). Studies have shown that the most frequent error is  
55 "premature closure", meaning 'the tendency to stop considering other possibilities after reaching  
56 a diagnosis' (28, 29). In the UK, diagnosis- and assessment-related incidents were the highest  
57 causes of patient harm (26). As a conclusion, the ability to utilise differential diagnostic methods is  
58  
59  
60

1  
2  
3 key when diagnosing wound aetiologies. There is always a danger of diagnosing a wound  
4 incorrectly, if possibilities to perform differential diagnostics are lacking (19, 27).  
5

6  
7 As a solution, a broader range of differential diagnostic possibilities as regards the origin of the  
8 wound would probably help in the first evaluation and in avoiding diagnostic error and delay in the  
9 treatment (30-31). One practical tool to tackle these diagnostic challenges could be the use of  
10 checklists (32-34). It has been determined in other contexts that there are tools for avoiding fatal  
11 errors in differential diagnostics, such as existing guidelines and, to be regarded with a grain of  
12 salt, electronic aids in decision making (35-37)  
13  
14

### 15 **Limitations**

16  
17 The limitations of this study are related to the variety of aetiologies behind chronic wounds. There  
18 are no generally agreed-upon diagnostic codes to be used for chronic wounds, and the  
19 differentiation potential is enormous. Most often wounds are coded as merely a wound of  
20 unspecified aetiology (L97, L98), or they are S-coded, which refers to a traumatic wound.  
21 Therefore, it is difficult to define when a diagnosis is correct or not.  
22  
23

24  
25 Outliers also constituted a limitation of the study, as we could not include them in the data  
26 analysis. Some patients in the material had suffered from a wound for several years. Despite this,  
27 they were referred to the wound care team when it was established in 2013. In our delay analyses,  
28 we tried to avoid this bias by selecting patients whose wounds had appeared less than one year  
29 prior to the appointment with the wound care team.  
30

### 31 **Conclusion**

32  
33 It seems that the diagnostic delay of wound patients occurs within primary care. It is an  
34 organisational delay and causes patient harm, as the patients are not receiving a timely and  
35 correct diagnosis and treatment. Infectious wounds seem to be easy to detect, but there is a risk  
36 of overdiagnosis, leading to an overuse of antibiotics. However, primary care physicians seem to  
37 pay little attention to distinguishing arterial insufficiency or diabetic foot ulcers (DFU).  
38  
39

40  
41 The delay before seeing a primary care physician was not substantial, but the physicians'  
42 differential diagnostic approaches did not cover peripheral arterial disease or diabetic foot ulcers.  
43 Consequently, the delay before being seen by the wound care team was over one month, which is  
44 a long time when treating diabetic foot ulcers, especially those of vascular origin.  
45

46  
47 Based on our results, we propose that it is possible to arrange an optimal treatment pathway  
48 within a primary care setting, where a holistic wound care process is initiated, provided that there  
49 is organisational support, knowledge, skills and a multidisciplinary team available. It has been  
50 demonstrated that such an approach does not even require any additional resources, but rather a  
51 rearrangement of the patient care (16, 38). We also suggest that the specialist care clinics could  
52 play a supportive role in the treatment of complex wounds, while the primary care system could  
53 take responsibility for the holistic wound care.  
54  
55

56  
57 **Ethics:** Not applicable/No human participants included.

58  
59 **Contributorship statement:**  
60

1  
2  
3 Kirsti Ahmajärvi is the responsible guarantor of content and has contributed to the planning,  
4 conduct, and reporting of the work described in the article.  
5

6 Kirsi Isoherranen has contributed to the planning and reporting of the work described in this  
7 article.  
8

9 Maarit Venermo has contributed to the following parts in this study: Design of the study, data  
10 analysis and interpretation, revisions to scientific content of the manuscript, review and editing of  
11 the final manuscript.  
12  
13

14 The corresponding author attests that all listed authors meet authorship criteria and that no  
15 others meeting the criteria have been omitted.  
16

17 **Competing interest:** All authors have completed the ICMJE uniform disclosure form  
18 at Helsinki and declare: Kirsi Isoherranen and Maarit Venermo has no support from any  
19 organisation for the submitted work, Kirsti Ahmajärvi has received a working grant from the  
20 University of Helsinki, The Finnish Wound Association and The Finnish Association for General  
21 Practice. ; no financial relationships with any organisations that might have an interest in the  
22 submitted work in the previous three years; no other relationships or activities that could appear  
23 to have influenced the submitted work.  
24  
25  
26  
27

28 **Funding:** Kirsti Ahmajärvi has received a personal working grant from the University of Helsinki,  
29 The Finnish Wound Association and The Finnish Association for General Practice. This research  
30 received no specific grant from any funding agency in the public, commercial or not-for-profit  
31 sectors.  
32  
33

34 **Data sharing statement:** Data is not available in any system for data sharing.  
35  
36  
37

### 38 **References:**

- 39 1. Lindholm C, Searle R. Wound management for the 21st century: combining effectiveness  
40 and efficiency. *Int Wound J.* 2016;13:5-15.
- 41 2. Phillips CJ, Humphreys I, Fletcher J et al. Estimating the costs associated with the  
42 management of patients with chronic wounds using linked routine data. *Int Wound*  
43 *J.* 2016;13(6):1193-7.
- 44 3. Guest JF, Ayoub N, McIlwraith T et al. Health economic burden that different wound types  
45 impose on the UK's National Health Service. *Int Wound J.* 2017;14(2):322-30.
- 46 4. Guest JF, Fuller GW, Vowden P. Cohort study evaluating the burden of wounds to the UK's  
47 National Health Service in 2017/2018: update from 2012/2013. *BMJ open.* 2020;10(12):e045253-e.
- 48 5. Sen CK. Human Wound and Its Burden: Updated 2020 Compendium of Estimates. *Adv*  
49 *Wound Care (New Rochelle).* 2021;10(5):281-92.
- 50 6. Herber OR, Schnepf W, Rieger MA. A systematic review on the impact of leg ulceration on  
51 patients' quality of life. *Health Qual Life Outcomes.* 2007;5:44.
- 52 7. Green J, Jester R, McKinley R et al. The impact of chronic venous leg ulcers: a systematic  
53 review. *J Wound Care.* 2014;23(12):601-12.  
54  
55  
56  
57  
58  
59  
60

- 1
  - 2
  - 3
  - 4
  - 5
  - 6
  - 7
  - 8
  - 9
  - 10
  - 11
  - 12
  - 13
  - 14
  - 15
  - 16
  - 17
  - 18
  - 19
  - 20
  - 21
  - 22
  - 23
  - 24
  - 25
  - 26
  - 27
  - 28
  - 29
  - 30
  - 31
  - 32
  - 33
  - 34
  - 35
  - 36
  - 37
  - 38
  - 39
  - 40
  - 41
  - 42
  - 43
  - 44
  - 45
  - 46
  - 47
  - 48
  - 49
  - 50
  - 51
  - 52
  - 53
  - 54
  - 55
  - 56
  - 57
  - 58
  - 59
  - 60
8. Mooij MC, Huisman LC. Chronic leg ulcer: does a patient always get a correct diagnosis and adequate treatment? *Phlebology*. 2016;31(1 Suppl):68-73.
9. Dean S. Leg ulcers - causes and management. *Aust Fam Physician*. 2006;35(7):480-4.
10. Atkin L, Bućko Z, Conde Montero E et al. Implementing TIMERS: the race against hard-to-heal wounds. *J Wound Care*. 2019;23(Sup3a):S1-s50.
11. Garcia-Klepzig JL, Sánchez-Ríos JP, Manu C et al. Perception of diabetic foot ulcers among general practitioners in four European countries: knowledge, skills and urgency. *J Wound Care*. 2018;27(5):310-9.
12. Sánchez-Ríos JP, García-Klepzig JL, Manu C et al. Referral of patients with diabetic foot ulcers in four European countries: patient follow-up after first GP visit. *J Wound Care*. 2019;28(Sup8):S4-s14.
13. Sheikh A, Donaldson L, Dhingra-Kumar N et al. Diagnostic Errors: *Technical Series on Safer Primary Care*. Geneva: World Health Organization; 2016. Licence: CC BY-NC-SA 3.0 IGO2016.
14. Kostopoulou O, Delaney BC, Munro CW. Diagnostic difficulty and error in primary care--a systematic review. *Fam Pract*. 2008;25(6):400-13.
15. Irving G, Neves AL, Dambha-Miller H et al. International variations in primary care physician consultation time: a systematic review of 67 countries. *BMJ Open*. 2017;7(10):e017902.
16. Laakso M, Honkasalo M, Kiiski J et al. Re-organizing inpatient care saves legs in patients with diabetic foot infections. *Diabetes Research and Clinical Practice*. 2017;125:39-46.
17. Noronen K, Saarinen E, Albäck A et al. Analysis of the Elective Treatment Process for Critical Limb Ischaemia with Tissue Loss: Diabetic Patients Require Rapid Revascularisation. *Eur J Vasc Endovasc Surg*. 2017;53(2):206-13.
18. Walker CM, Bunch FT, Cavros NG et al. Multidisciplinary approach to the diagnosis and management of patients with peripheral arterial disease. *Clin Interv Aging*. 2015;10:1147-53.
19. Eliassen A, Vandy F, McHugh J et al. Marjolin's ulcer in a patient with chronic venous stasis. *Ann Vasc Surg*. 2013;27(8):1182.e5-8.
20. Janowska A, Oranges T, Chiricozzi A et al. Synergism of Therapies After Postoperative Autograft Failure in a Patient With Melanoma of the Foot Misdiagnosed as a Pressure Ulcer. *Wounds*. 2018;30(4):E41-e3.
21. Ahmajärvi KM, Isoherranen KM, Mäkelä A et al. A change in the prevalence and the etiological factors of chronic wounds in Helsinki metropolitan area during 2008-2016. *Int Wound J*. 2019;16(2):522-6.
22. Manu C, Lacopi E, Bouillet B et al. Delayed referral of patients with diabetic foot ulcers across Europe: patterns between primary care and specialised units. *J Wound Care*. 2018;27(3):186-92.
23. Oien RF, Forssell HW. Ulcer healing time and antibiotic treatment before and after the introduction of the Registry of Ulcer Treatment: an improvement project in a national quality registry in Sweden. *BMJ open*. 2013;3(8):e003091-e.
24. Woo KY. Physicians' knowledge and attitudes in the management of wound infection. *Int Wound J*. 2016;13(5):600-4.
25. Salava A, Isoherranen K. Rule of three I's: a mnemonic aid in undergraduate teaching of lower limb wounds. *J Wound Care*. 2021;30(12):1030.
26. Carson-Stevens A, Hibbert P, Williams H, Evans HP, Cooper A, Rees P, et al. Health Services and Delivery Research. Characterising the nature of primary care patient safety incident reports in the England and Wales National Reporting and Learning System: a mixed-methods agenda-setting study for general practice. Southampton (UK): *NIHR Journals Library*.2016.

- 1  
2  
3 27. Ely JW, Kaldjian LC, D'Alessandro DM. Diagnostic errors in primary care: lessons learned. *J*  
4 *Am Board Fam Med*. 2012;25(1):87-97.  
5 28. Norman GR, Eva KW. Diagnostic error and clinical reasoning. *Med Educ*. 2010;44(1):94-100.  
6 29. Graber ML, Franklin N, Gordon R. Diagnostic error in internal medicine. *Arch Intern Med*.  
7 2005;165(13):1493-9.  
8 30. Schiff GD, Hasan O, Kim S et al. Diagnostic error in medicine: analysis of 583 physician-  
9 reported errors. *Arch Intern Med*. 2009;169(20):1881-7.  
10 31. Maude J. Differential diagnosis: the key to reducing diagnosis error, measuring diagnosis  
11 and a mechanism to reduce healthcare costs. *Diagnosis (Berl)*. 2014;1(1):107-9.  
12 32. Snyder RJ, Jensen J, Applewhite AJ et al. A Standardized Approach to Evaluating Lower  
13 Extremity Chronic Wounds Using a Checklist. *Wounds*. 2019;31(5 Suppl):S29-s44.  
14 33. Kapp S, Santamaria N. The "self-treatment of wounds for venous leg ulcers checklist"  
15 (STOW-V Checklist V1.0): Part 1-Development, pilot and refinement of the checklist. *Int Wound J*.  
16 2022;19(3):705-713.  
17 34. Wiseman JT, Fernandes-Taylor S, Gunter R et al. Inter-rater agreement and checklist  
18 validation for postoperative wound assessment using smartphone images in vascular surgery. *J*  
19 *Vasc Surg Venous Lymphat Disord*. 2016;4(3):320-8.e2.  
20 35. Bond WF, Schwartz LM, Weaver KR et al. Differential diagnosis generators: an evaluation of  
21 currently available computer programs. *J Gen Intern Med*. 2012;27(2):213-9.  
22 36. Riches N, Panagioti M, Alam R et al. The Effectiveness of Electronic Differential Diagnoses  
23 (DDX) Generators: A Systematic Review and Meta-Analysis. *PLoS One*. 2016;11(3):e0148991.  
24 37. El-Kareh R, Hasan O, Schiff GD. Use of health information technology to reduce diagnostic  
25 errors. *BMJ Qual Saf*. 2013;22 Suppl 2(Suppl 2):ii40-ii51.  
26 38. Sanders AP, Stoeldraaijers LG, Pero MW et al. Patient and professional delay in the referral  
27 trajectory of patients with diabetic foot ulcers. *Diabetes Res Clin Pract*. 2013;102(2):105-11.  
28  
29  
30  
31  
32  
33  
34  
35  
36  
37  
38  
39  
40  
41  
42  
43  
44  
45  
46  
47  
48  
49  
50  
51  
52  
53  
54  
55  
56  
57  
58  
59  
60

Figure 1

**Diagnoses by the primary care physician**

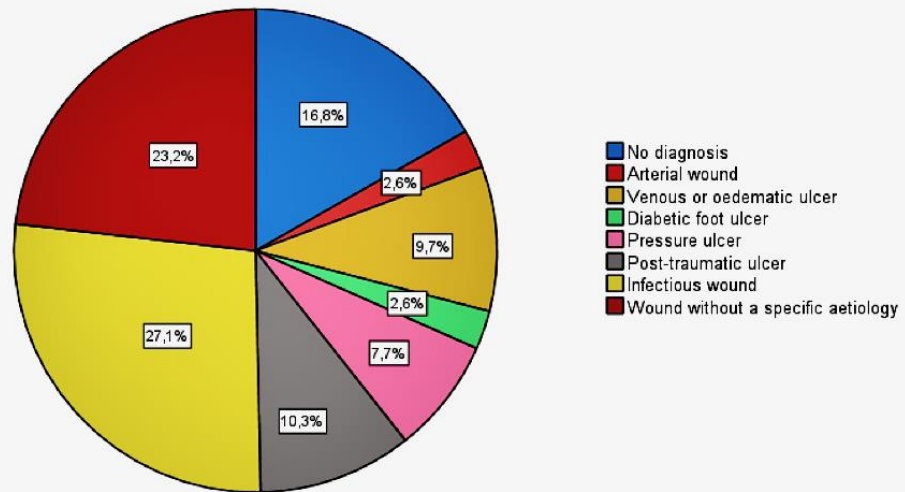

N = 155 patients visited primary care physician

**Diagnoses by the wound care team physician**

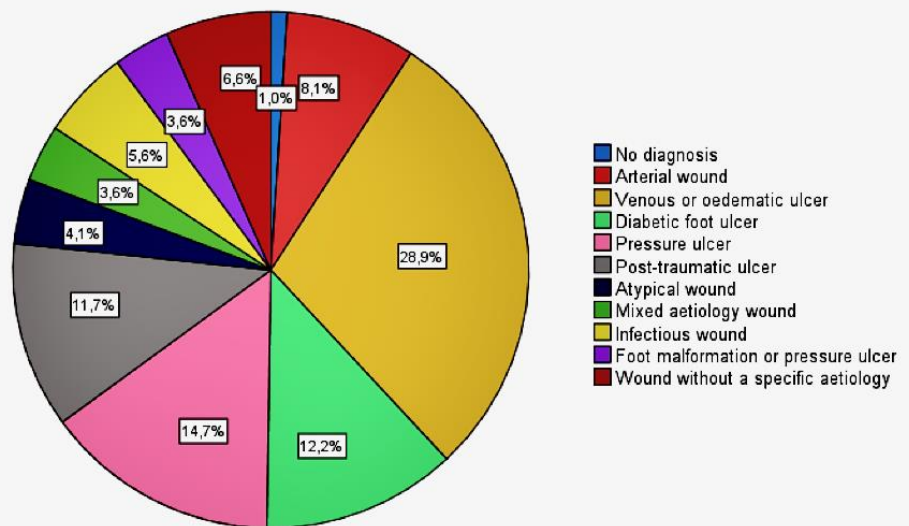

N = 197 patients visited the wound care team physician

Supplementary Table 1. Diagnostic codes included in the 10 chosen diagnostic categories.

| Category                       | no. | ICD-10 codes                                                                                                                                                                                                |
|--------------------------------|-----|-------------------------------------------------------------------------------------------------------------------------------------------------------------------------------------------------------------|
| Arterial wound                 | 1   | I70.2, L97, E10.4, E11, E11.7, E11.5, E11.4, M10, R60, S91.1, S81.8                                                                                                                                         |
| Venous or oedematous ulcer     | 2   | S81.8, S81.2, R60, R60.9, L97, I83, I83.0, I83.2, I87.2, I89.0, I88.0, R66+R60+L97                                                                                                                          |
| Diabetic ulcer                 | 3   | E11 + L97, E11.7+L97, E11.5, M20.2, M20.4, S92.5, E11.4+L97, E11.8+L97+I70.2, E11.7+S91.3, E11.5+L97, E11+G30.1, E10.7+L97, E10.6+M14.2+L97, N08.39*E11.2+L97, E10+L97, E10.6+R02+L07, E11.2+L97, E10.4+L97 |
| Pressure ulcer                 | 4   | L89, G58.7 + L97, I69.3+L89+L97                                                                                                                                                                             |
| Post-traumatic wound           | 5   | S80, T22, S81, S81.1, T24.4, T24.0, S81.8, S81.0, S81.8, T93.0, S91.0, S51.9, S01.1                                                                                                                         |
| Atypical wound                 | 6   | C44.75, C44.72, S01.3, D23.2, L90.5, T95.2, L88, K42.9, S31.3, T09.1                                                                                                                                        |
| Mixed aetiology                | 7   | I70.2+L97+I83, I70.2+R60+L97, T33.5+M86, T33.4+M86, I87.2+I70.2+E11.7+L97                                                                                                                                   |
| Infectious wound               | 8   | L02.4, L02, L02.3, L02.9, L03, L05.0, A46, L08.8, L08, L08.9, L05, L05.0, L05.9, L00, T79.3, A49.9, M86.6+L89, L30, L72, L72.0, L72.1, K61.0, K60.3, K60                                                    |
| Foot malformation/pressure     | 9   | L97, L89, I70.2 +L97, L97+M10, M05.9+L89                                                                                                                                                                    |
| Wound of unspecified aetiology | 10  | S71.0, S82.3, S91.3, S91.0, S91, S81.3, S81, S81.9, L97, S86.0, M71.1, S41.1, T13.1, L98.4, T93.0, T81.4, T81.3                                                                                             |

## STROBE Statement—checklist of items that should be included in reports of observational studies

|                           | Item No. | Recommendation                                                                                                                                                                                | Page No. | Relevant text from manuscript                                                                                                                                                                                                           |
|---------------------------|----------|-----------------------------------------------------------------------------------------------------------------------------------------------------------------------------------------------|----------|-----------------------------------------------------------------------------------------------------------------------------------------------------------------------------------------------------------------------------------------|
| <b>Title and abstract</b> | 1        | (a) Indicate the study's design with a commonly used term in the title or the abstract<br>(b) Provide in the abstract an informative and balanced summary of what was done and what was found | 5        | A cohort study                                                                                                                                                                                                                          |
| <b>Introduction</b>       |          |                                                                                                                                                                                               |          |                                                                                                                                                                                                                                         |
| Background/rationale      | 2        | Explain the scientific background and rationale for the investigation being reported                                                                                                          | 5        | Chronic wounds pose a significant burden to health care, both to the patients and to the system. Diagnostic process begins from primary care, and there should be timely diagnostic processes for patients suffering from a wound       |
| Objectives                | 3        | State specific objectives, including any prespecified hypotheses                                                                                                                              | 5        | We analysed delay in the treatment of patients with chronic wounds and analyzed also the diagnostic process among wound patients. Furthermore, we evaluated the impact of a special wound care team within primary care on this process |
| <b>Methods</b>            |          |                                                                                                                                                                                               |          |                                                                                                                                                                                                                                         |
| Study design              | 4        | Present key elements of study design early in the paper                                                                                                                                       | 6        | A cohort was collected                                                                                                                                                                                                                  |
| Setting                   | 5        | Describe the setting, locations, and relevant dates, including periods of recruitment, exposure, follow-up, and data collection                                                               | 6        | A cohort was collected in April-September 2016, in Helsinki health care centre at first visit to a wound care team and included                                                                                                         |



1  
2  
3  
4  
5  
6  
7  
8  
9  
10  
11  
12  
13  
14  
15  
16  
17  
18  
19  
20  
21  
22  
23  
24  
25  
26  
27  
28  
29  
30  
31  
32  
33  
34  
35  
36  
37  
38  
39  
40  
41  
42  
43  
44  
45  
46

|              |   |                                                                                                                                                                                                                                                                                                                                                                                                                                                                                    |   |                                                                                                                                                                                                                                                                                                                                                                                                                                                                                                            |
|--------------|---|------------------------------------------------------------------------------------------------------------------------------------------------------------------------------------------------------------------------------------------------------------------------------------------------------------------------------------------------------------------------------------------------------------------------------------------------------------------------------------|---|------------------------------------------------------------------------------------------------------------------------------------------------------------------------------------------------------------------------------------------------------------------------------------------------------------------------------------------------------------------------------------------------------------------------------------------------------------------------------------------------------------|
|              |   |                                                                                                                                                                                                                                                                                                                                                                                                                                                                                    |   | 197 consecutive patients. The patient records were analysed both backwards and onwards for data collection. Data collection included onset of the wound until endpoint which was healing. Diagnostic delays were recorded by collecting the dates of first visit in the health services, wound care team and specialist care and by collecting the diagnosis found from the patient record.                                                                                                                |
| Participants | 6 | <p>(a) <i>Cohort study</i>—Give the eligibility criteria, and the sources and methods of selection of participants. Describe methods of follow-up</p> <p><i>Case-control study</i>—Give the eligibility criteria, and the sources and methods of case ascertainment and control selection. Give the rationale for the choice of cases and controls</p> <p><i>Cross-sectional study</i>—Give the eligibility criteria, and the sources and methods of selection of participants</p> | 6 | <p>Criteria: Patients suffering for a chronic wound and sent to a wound care team consultation within primary care at their first visit there. Follow-up from patient records as well as gathering the data backwards from the patient records until the onset of the wound. Additionally, demographic data, the number of visits to health care and earlier examinations were collected. The diagnoses set at the first visit, at the wound care team and at the specialist care visit were compared.</p> |
|              |   | <p>(b) <i>Cohort study</i>—For matched studies, give matching criteria and number of exposed and unexposed</p>                                                                                                                                                                                                                                                                                                                                                                     |   |                                                                                                                                                                                                                                                                                                                                                                                                                                                                                                            |

| <i>Case-control study</i> —For matched studies, give matching criteria and the number of controls per case |    |                                                                                                                                                                                      |   |                                                                                                                                                                                                                                                                                                                                   |
|------------------------------------------------------------------------------------------------------------|----|--------------------------------------------------------------------------------------------------------------------------------------------------------------------------------------|---|-----------------------------------------------------------------------------------------------------------------------------------------------------------------------------------------------------------------------------------------------------------------------------------------------------------------------------------|
| Variables                                                                                                  | 7  | Clearly define all outcomes, exposures, predictors, potential confounders, and effect modifiers. Give diagnostic criteria, if applicable                                             | 6 | For delay article we examined the dates and diagnostic codes of each visit for a physician in the health care system throughout the clinical treatment path. We examined how the ICD-codes differentiated between physicians' and which diagnostic procedures and tests or treatment was used to determine the correct diagnosis. |
| Data sources/<br>measurement                                                                               | 8* | For each variable of interest, give sources of data and details of methods of assessment (measurement). Describe comparability of assessment methods if there is more than one group | 6 | Data collected from the patient records.                                                                                                                                                                                                                                                                                          |
| Bias                                                                                                       | 9  | Describe any efforts to address potential sources of bias                                                                                                                            | 8 | Potential bias is the variation of the diagnostic codes, ICD-10, as the diagnostic procedures varied remarkably. We have explained in the article how we decided the date of the correct diagnosis. Also outliers constitute a possible bias. Some had been suffering from a wound for years and/or the wound never healed.       |
| Study size                                                                                                 | 10 | Explain how the study size was arrived at                                                                                                                                            | 6 | We collected 197 patients: No power estimates have been done.                                                                                                                                                                                                                                                                     |

Continued on next page

|    |                |     |                                                                                                    |       |                                       |
|----|----------------|-----|----------------------------------------------------------------------------------------------------|-------|---------------------------------------|
| 1  |                |     |                                                                                                    |       |                                       |
| 2  | Quantitative   | 11  | Explain how quantitative variables were handled in the analyses. If applicable, describe which     | 6     | We removed patients who had           |
| 3  | variables      |     | groupings were chosen and why                                                                      |       | wounds over 365 days prior the        |
| 4  |                |     |                                                                                                    |       | wound care team visit from the        |
| 5  |                |     |                                                                                                    |       | delay analyses, but included them     |
| 6  |                |     |                                                                                                    |       | in the descriptive analyses for basic |
| 7  |                |     |                                                                                                    |       | demography.                           |
| 8  |                |     |                                                                                                    |       |                                       |
| 9  | Statistical    | 12  | (a) Describe all statistical methods, including those used to control for confounding              | 11,19 | We were using SPSS for statistical    |
| 10 | methods        |     |                                                                                                    |       | analysis. Descriptives and            |
| 11 |                |     |                                                                                                    |       | Frequencies, Explore, Means were      |
| 12 |                |     |                                                                                                    |       | used. Two-Independent Samples         |
| 13 |                |     |                                                                                                    |       | Test were used.                       |
| 14 |                |     |                                                                                                    |       |                                       |
| 15 |                |     |                                                                                                    |       |                                       |
| 16 |                |     | (b) Describe any methods used to examine subgroups and interactions                                | 11,19 | Two-Independent Samples Test          |
| 17 |                |     |                                                                                                    |       | were used, (Mann-Whitney-U test )     |
| 18 |                |     |                                                                                                    |       | when comparing the subgroups and      |
| 19 |                |     |                                                                                                    |       | differences in delays between them    |
| 20 |                |     |                                                                                                    |       | and Pearsons chii-square and          |
| 21 |                |     |                                                                                                    |       | ANOVA-tests when comparing            |
| 22 |                |     |                                                                                                    |       | subgroups of male and female in       |
| 23 |                |     |                                                                                                    |       | background descriptives               |
| 24 |                |     |                                                                                                    |       |                                       |
| 25 |                |     |                                                                                                    |       |                                       |
| 26 |                |     | (c) Explain how missing data were addressed                                                        |       | Not much missing data. We             |
| 27 |                |     |                                                                                                    |       | analysed the groups and removed       |
| 28 |                |     |                                                                                                    |       | the outliers from delay analyses.     |
| 29 |                |     |                                                                                                    |       |                                       |
| 30 |                |     | (d) Cohort study—If applicable, explain how loss to follow-up was addressed                        |       | No loss to follow-up                  |
| 31 |                |     | Case-control study—If applicable, explain how matching of cases and controls was addressed         |       |                                       |
| 32 |                |     | Cross-sectional study—If applicable, describe analytical methods taking account of sampling        |       |                                       |
| 33 |                |     | strategy                                                                                           |       |                                       |
| 34 |                |     |                                                                                                    |       |                                       |
| 35 |                |     | (e) Describe any sensitivity analyses                                                              |       |                                       |
| 36 |                |     |                                                                                                    |       |                                       |
| 37 | <b>Results</b> |     |                                                                                                    |       |                                       |
| 38 | Participants   | 13* | (a) Report numbers of individuals at each stage of study—eg numbers potentially eligible, examined | 8     | 197 patients included in the study    |
| 39 |                |     | for eligibility, confirmed eligible, included in the study, completing follow-up, and analysed     |       | 182 patients in the delay analyses    |
| 40 |                |     |                                                                                                    |       |                                       |
| 41 |                |     |                                                                                                    |       |                                       |
| 42 |                |     |                                                                                                    |       |                                       |
| 43 |                |     |                                                                                                    |       |                                       |
| 44 |                |     |                                                                                                    |       |                                       |
| 45 |                |     |                                                                                                    |       |                                       |
| 46 |                |     |                                                                                                    |       |                                       |

|                  |     |                                                                                                                                          |         |                                                                                                                                                                                                                                                                                                                                                                                                                                  |
|------------------|-----|------------------------------------------------------------------------------------------------------------------------------------------|---------|----------------------------------------------------------------------------------------------------------------------------------------------------------------------------------------------------------------------------------------------------------------------------------------------------------------------------------------------------------------------------------------------------------------------------------|
|                  |     | (b) Give reasons for non-participation at each stage                                                                                     | 6       | Excluded from the delay analyses patients which had onset of the wound over 365 days prior the wound care team visit.                                                                                                                                                                                                                                                                                                            |
|                  |     | (c) Consider use of a flow diagram                                                                                                       |         |                                                                                                                                                                                                                                                                                                                                                                                                                                  |
| Descriptive data | 14* | (a) Give characteristics of study participants (eg demographic, clinical, social) and information on exposures and potential confounders | 9-11,13 | Characteristic are found in the table 1–3                                                                                                                                                                                                                                                                                                                                                                                        |
|                  |     | (b) Indicate number of participants with missing data for each variable of interest                                                      | 11      | Missing data: fP-Gluk n=4, HbA1c n=44, LDL n=28, BMI n=19, ABI primary care n=179, ABI wound care team n=86                                                                                                                                                                                                                                                                                                                      |
|                  |     | (c) <i>Cohort study</i> —Summarise follow-up time (eg, average and total amount)                                                         |         | Follow-up from the first visit in the wound care team for until wound healing or 365days.                                                                                                                                                                                                                                                                                                                                        |
| Outcome data     | 15* | <i>Cohort study</i> —Report numbers of outcome events or summary measures over time                                                      | 18,19   | Delays are presented in Median days ( IQR;Min-Max;Range)<br><b>Patient-related delay</b> 2(0-14;0-351;351), From onset of the wound to first physician evaluation 8(1-32;0-314;314), From onset of the wound to wound care team( <b>diagnostic delay</b> ) 57(33-101;2-358;356), From the first contact to wound care team( <b>organizational delay</b> ) 42(22-80;1-484;483) wound care team to specialist 21(7-52;-58-252;414) |
|                  |     | <i>Case-control study</i> —Report numbers in each exposure category, or summary measures of exposure                                     |         |                                                                                                                                                                                                                                                                                                                                                                                                                                  |
|                  |     | <i>Cross-sectional study</i> —Report numbers of outcome events or summary measures                                                       |         |                                                                                                                                                                                                                                                                                                                                                                                                                                  |

1  
2  
3  
4  
5  
6  
7  
8  
9  
10  
11  
12  
13  
14  
15  
16  
17  
18  
19  
20  
21  
22  
23  
24  
25  
26  
27  
28  
29  
30  
31  
32  
33  
34  
35  
36  
37  
38  
39  
40  
41  
42  
43  
44  
45  
46

|                                                                                                                         |    |                                                                                                                                                                                                              |       |                                                                                                                                                                                                                              |
|-------------------------------------------------------------------------------------------------------------------------|----|--------------------------------------------------------------------------------------------------------------------------------------------------------------------------------------------------------------|-------|------------------------------------------------------------------------------------------------------------------------------------------------------------------------------------------------------------------------------|
| Main results                                                                                                            | 16 | (a) Give unadjusted estimates and, if applicable, confounder-adjusted estimates and their precision (eg, 95% confidence interval). Make clear which confounders were adjusted for and why they were included | 18,19 | Median patient-related delay was 2 days (IQR 0-14), physicians' first evaluation 8 days(1-32), wound care team 57days (33-101)<br>Organizational delay from first contact to health services to diagnosis was 42 days(22-80) |
| <hr/>                                                                                                                   |    |                                                                                                                                                                                                              |       |                                                                                                                                                                                                                              |
| <i>(b)</i> Report category boundaries when continuous variables were categorized                                        |    |                                                                                                                                                                                                              |       |                                                                                                                                                                                                                              |
| <hr/>                                                                                                                   |    |                                                                                                                                                                                                              |       |                                                                                                                                                                                                                              |
| <i>(c)</i> If relevant, consider translating estimates of relative risk into absolute risk for a meaningful time period |    |                                                                                                                                                                                                              |       |                                                                                                                                                                                                                              |
| <hr/>                                                                                                                   |    |                                                                                                                                                                                                              |       |                                                                                                                                                                                                                              |

Continued on next page

|    |                   |    |                                                                                                                                                                            |                                       |
|----|-------------------|----|----------------------------------------------------------------------------------------------------------------------------------------------------------------------------|---------------------------------------|
| 1  |                   |    |                                                                                                                                                                            |                                       |
| 2  | Other analyses    | 17 | Report other analyses done—eg analyses of subgroups and interactions, and sensitivity analyses                                                                             | 14                                    |
| 3  |                   |    |                                                                                                                                                                            |                                       |
| 4  |                   |    |                                                                                                                                                                            | 21.3% out of 197 were not seen by     |
| 5  |                   |    |                                                                                                                                                                            | primary care physician. Of those      |
| 6  |                   |    |                                                                                                                                                                            | who met the physician, the            |
| 7  |                   |    |                                                                                                                                                                            | diagnosis was recorded in 129         |
| 8  |                   |    |                                                                                                                                                                            | cases. The diagnosis was consistent   |
| 9  |                   |    |                                                                                                                                                                            | with the diagnosis of the wound       |
| 10 |                   |    |                                                                                                                                                                            | care team was in 59 cases.            |
| 11 | <b>Discussion</b> |    |                                                                                                                                                                            |                                       |
| 12 | Key results       | 18 | Summarise key results with reference to study objectives                                                                                                                   | 21                                    |
| 13 |                   |    |                                                                                                                                                                            | Key results are: the delay for        |
| 14 |                   |    |                                                                                                                                                                            | correct diagnosis is median 57 days   |
| 15 |                   |    |                                                                                                                                                                            | from the onset of the wound,          |
| 16 |                   |    |                                                                                                                                                                            | whereas optimate wound diagnosis      |
| 17 |                   |    |                                                                                                                                                                            | should occur in 14 days.              |
| 18 |                   |    |                                                                                                                                                                            | The delay is organizational (and      |
| 19 |                   |    |                                                                                                                                                                            | diagnostical) since the first         |
| 20 |                   |    |                                                                                                                                                                            | physician contact is median 8 days    |
| 21 |                   |    |                                                                                                                                                                            | from the onset of the wound and       |
| 22 |                   |    |                                                                                                                                                                            | there was a minimum patient-          |
| 23 |                   |    |                                                                                                                                                                            | related delay.                        |
| 24 |                   |    |                                                                                                                                                                            |                                       |
| 25 |                   |    |                                                                                                                                                                            |                                       |
| 26 | Limitations       | 19 | Discuss limitations of the study, taking into account sources of potential bias or imprecision. Discuss both direction and magnitude of any potential bias                 | 23                                    |
| 27 |                   |    |                                                                                                                                                                            | The same as in Bias- section.         |
| 28 |                   |    |                                                                                                                                                                            | Also one limitation might be          |
| 29 |                   |    |                                                                                                                                                                            | selection bias, when all patients are |
| 30 |                   |    |                                                                                                                                                                            | sent to a consultation. Additionally, |
| 31 |                   |    |                                                                                                                                                                            | there was not a comparison group      |
| 32 |                   |    |                                                                                                                                                                            | (patients with chronic wounds and     |
| 33 |                   |    |                                                                                                                                                                            | not possibilities for a wound care    |
| 34 |                   |    |                                                                                                                                                                            | team consultation/before the          |
| 35 |                   |    |                                                                                                                                                                            | establishment of the team).           |
| 36 |                   |    |                                                                                                                                                                            |                                       |
| 37 | Interpretation    | 20 | Give a cautious overall interpretation of results considering objectives, limitations, multiplicity of analyses, results from similar studies, and other relevant evidence | 23                                    |
| 38 |                   |    |                                                                                                                                                                            | This study describes the diagnostic   |
| 39 |                   |    |                                                                                                                                                                            | processes and delays of patients      |
| 40 |                   |    |                                                                                                                                                                            | with wounds in Helsinki               |
| 41 |                   |    |                                                                                                                                                                            |                                       |
| 42 |                   |    |                                                                                                                                                                            |                                       |

1  
2  
3  
4  
5  
6  
7  
8  
9  
10  
11  
12  
13  
14  
15  
16  
17  
18  
19  
20  
21  
22  
23  
24  
25  
26  
27  
28  
29  
30  
31  
32  
33  
34  
35  
36  
37  
38  
39  
40  
41  
42  
43  
44  
45  
46

|                          |    |                                                                                                                                                               |    |                                                                                                                                                                                                                                                                                                                                                                                |
|--------------------------|----|---------------------------------------------------------------------------------------------------------------------------------------------------------------|----|--------------------------------------------------------------------------------------------------------------------------------------------------------------------------------------------------------------------------------------------------------------------------------------------------------------------------------------------------------------------------------|
|                          |    |                                                                                                                                                               |    | metropolitan area. Our conclusion and suggestion is, that it is beneficial to organize wound care teams in the firstline in the primary care to detect as soon as possible the wounds and to start optimal care for these patients. Avoiding delays and erroneous diagnosis is essential in avoiding patient harm and costs.                                                   |
| Generalisability         | 21 | Discuss the generalisability (external validity) of the study results                                                                                         | 23 | This study provides a model for the primary care; how to make wound care safer for the patients with a little effort, team education, re-organization and support from the specialist care. Similar teams could be arranged anywhere in primary care.                                                                                                                          |
| <b>Other information</b> |    |                                                                                                                                                               |    |                                                                                                                                                                                                                                                                                                                                                                                |
| Funding                  | 22 | Give the source of funding and the role of the funders for the present study and, if applicable, for the original study on which the present article is based | 24 | Funding is for Kirsti Ahmajärvi , responsible author, from the University of Helsinki to work some months as PhD Student(“out-of office”-vacations for studies) Also Grants for a couple of months from non-profital organizations to support the PhD work (“out-of office”-vacations supports) The Finnish Wound Association and The Finnish Association for General Practice |

1  
2 \*Give information separately for cases and controls in case-control studies and, if applicable, for exposed and unexposed groups in cohort and cross-sectional studies.  
3

4 **Note:** An Explanation and Elaboration article discusses each checklist item and gives methodological background and published examples of transparent reporting. The STROBE  
5 checklist is best used in conjunction with this article (freely available on the Web sites of PLoS Medicine at <http://www.plosmedicine.org/>, Annals of Internal Medicine at  
6 <http://www.annals.org/>, and Epidemiology at <http://www.epidem.com/>). Information on the STROBE Initiative is available at [www.strobe-statement.org](http://www.strobe-statement.org).  
7  
8  
9

10  
11  
12  
13  
14  
15  
16  
17  
18  
19  
20  
21  
22  
23  
24  
25  
26  
27  
28  
29  
30  
31  
32  
33  
34  
35  
36  
37  
38  
39  
40  
41  
42  
43  
44  
45  
46

For peer review only



# BMJ Open

## A Cohort Study of Diagnostic Delay in the Clinical Pathway of Patients with Chronic Wounds in the Primary Care Setting

|                                 |                                                                                                                                                                                                                                                                                                                                   |
|---------------------------------|-----------------------------------------------------------------------------------------------------------------------------------------------------------------------------------------------------------------------------------------------------------------------------------------------------------------------------------|
| Journal:                        | <i>BMJ Open</i>                                                                                                                                                                                                                                                                                                                   |
| Manuscript ID                   | bmjopen-2022-062673.R1                                                                                                                                                                                                                                                                                                            |
| Article Type:                   | Original research                                                                                                                                                                                                                                                                                                                 |
| Date Submitted by the Author:   | 10-Aug-2022                                                                                                                                                                                                                                                                                                                       |
| Complete List of Authors:       | Ahmajärvi, Kirsti; Helsinki University Central Hospital, Doctoral Programme in Populational Health and Department of General Practice and Primary Health Care<br>Isoherranen, K; Helsinki University Central Hospital, Dermatological Department<br>Venermo, M; Helsinki University Central Hospital, Vascular surgery Department |
| <b>Primary Subject Heading</b>: | Diagnostics                                                                                                                                                                                                                                                                                                                       |
| Secondary Subject Heading:      | Diabetes and endocrinology, Dermatology, General practice / Family practice, Medical education and training, Surgery                                                                                                                                                                                                              |
| Keywords:                       | WOUND MANAGEMENT, VASCULAR SURGERY, Diabetic foot < DIABETES & ENDOCRINOLOGY, Health & safety < HEALTH SERVICES ADMINISTRATION & MANAGEMENT, Quality in health care < HEALTH SERVICES ADMINISTRATION & MANAGEMENT, PRIMARY CARE                                                                                                   |
|                                 |                                                                                                                                                                                                                                                                                                                                   |

SCHOLARONE™  
Manuscripts



I, the Submitting Author has the right to grant and does grant on behalf of all authors of the Work (as defined in the below author licence), an exclusive licence and/or a non-exclusive licence for contributions from authors who are: i) UK Crown employees; ii) where BMJ has agreed a CC-BY licence shall apply, and/or iii) in accordance with the terms applicable for US Federal Government officers or employees acting as part of their official duties; on a worldwide, perpetual, irrevocable, royalty-free basis to BMJ Publishing Group Ltd ("BMJ") its licensees and where the relevant Journal is co-owned by BMJ to the co-owners of the Journal, to publish the Work in this journal and any other BMJ products and to exploit all rights, as set out in our [licence](#).

The Submitting Author accepts and understands that any supply made under these terms is made by BMJ to the Submitting Author unless you are acting as an employee on behalf of your employer or a postgraduate student of an affiliated institution which is paying any applicable article publishing charge ("APC") for Open Access articles. Where the Submitting Author wishes to make the Work available on an Open Access basis (and intends to pay the relevant APC), the terms of reuse of such Open Access shall be governed by a Creative Commons licence – details of these licences and which [Creative Commons](#) licence will apply to this Work are set out in our licence referred to above.

Other than as permitted in any relevant BMJ Author's Self Archiving Policies, I confirm this Work has not been accepted for publication elsewhere, is not being considered for publication elsewhere and does not duplicate material already published. I confirm all authors consent to publication of this Work and authorise the granting of this licence.

1  
2  
3 Title page  
4  
5  
6

7 A Cohort Study of Diagnostic Delay in the Clinical Pathway of Patients with Chronic Wounds in the  
8 Primary Care Setting  
9

10 Authors:  
11

- 12 1. Kirsti Ahmajärvi, MD, PhD Student, Specialist in General Practice, Special Competence in  
13 Wound Management
- 14 2. Kirsi Isoherranen, MD, PhD, Specialist in Dermatology and Allergology, Special Competence  
15 in Wound Management
- 16 3. Maarit Venermo, MD, PhD, Professor of Vascular Surgery  
17  
18

19 Address and position of each author:  
20

21 University of Helsinki, P.O. Box 4, 00014 University of Helsinki  
22

23  
24 1. K Ahmajärvi, MD, PhD Student, Specialist in General Practice, University of Helsinki, Doctoral  
25 Programme in Populational Health and Department of General Practice and Primary Health Care,  
26 University of Helsinki and Helsinki University Hospital, Helsinki, Finland. Helsinki University  
27 Hospital, P.O. Box 250, 00029 Helsinki  
28

29  
30 2. K Isoherranen, MD, PhD, Specialist of Dermatology and Allergology, Skin and Allergy Hospital,  
31 Meilahdentie 2, 00029 HUS, Finland.  
32

33  
34 3. M Venermo, MD, PhD, Vascular Surgeon, Professor of Vascular Surgery, Head of the  
35 Department, University of Helsinki and Helsinki University Hospital, Haartmaninkatu 4, 00290  
36 Helsinki, Finland  
37

38 Affiliations:  
39

40 1. K Ahmajärvi, MD, PhD Student, University of Helsinki, Doctoral Programme in Populational  
41 Health and Department of General Practice and Primary Health Care, University of Helsinki and  
42 Helsinki University Hospital, Helsinki, Finland  
43

44  
45 2. K Isoherranen, MD, PhD, Department of Dermatology and allergology, University of Helsinki  
46 and Inflammation Center, Helsinki University Hospital, Helsinki, Finland  
47

48  
49 3. M Venermo, MD, PhD, Vascular Surgeon, Professor of Vascular Surgery, Head of the  
50 Department, University of Helsinki and Helsinki University Hospital, Helsinki, Finland  
51

52 Corresponding Author: Kirsti Ahmajärvi  
53

54 Correspondence to: [kirsti.ahmajarvi@helsinki.fi](mailto:kirsti.ahmajarvi@helsinki.fi)  
55

56 ORCID: Kirsti Ahmajärvi: <https://orcid.org/0000-0001-9106-5915>  
57

58 ORCID: Kirsi Isoherranen: <https://orcid.org/0000-0002-0253-2567>  
59

60 ORCID: Maarit Venermo: <https://orcid.org/0000-0001-8814-0988>

1  
2  
3  
4  
5  
6  
7  
8  
9  
10  
11  
12  
13  
14  
15  
16  
17  
18  
19  
20  
21  
22  
23  
24  
25  
26  
27  
28  
29  
30  
31  
32  
33  
34  
35  
36  
37  
38  
39  
40  
41  
42  
43  
44  
45  
46  
47  
48  
49  
50  
51  
52  
53  
54  
55  
56  
57  
58  
59  
60

Kirsti Ahmajärvi is the responsible guarantor of content and has contributed to the designing the study, conducting, collecting and analyzing the data, and reporting of the work described in the article.

Kirsi Isoherranen has contributed to the following parts of the study: design of the study, reporting and review and editing of the final manuscript.

Maarit Venermo has contributed to the following parts in this study: Design of the study, data analysis and interpretation, revisions to scientific content of the manuscript, review and editing of the final manuscript.

The corresponding author attests that all listed authors meet authorship criteria and that no others meeting the criteria have been omitted.

Authors disclose these three types of information:

*Associations with commercial entities that provided support for the work reported in the submitted manuscript (the timeframe for disclosure in this section of the form is the lifespan of the work being reported):*

*Kirsti Ahmajärvi: Nothing to disclose*

*Kirsi Isoherranen: Nothing to disclose*

*Maarit Venermo: Nothing to disclose*

*Associations with commercial entities that could be viewed as having an interest in the general area of the submitted manuscript (in the three years before submission of the manuscript):*

*Kirsti Ahmajärvi: Nothing to disclose*

*Kirsi Isoherranen: Nothing to disclose*

*Maarit Venermo: Nothing to disclose*

*Non-financial associations that may be relevant or seen as relevant to the submitted manuscript:*

*Kirsti Ahmajärvi: Nothing to disclose*

*Kirsi Isoherranen: Nothing to disclose*

*Maarit Venermo: Nothing to disclose*

**No competing interests:** "All authors have completed the ICMJE uniform disclosure form at Helsinki and declare: no support from any organisation for the submitted work; no financial relationships with any organisations that might have an interest in the submitted work in the previous three years; no other relationships or activities that could appear to have influenced the submitted work."

"The Corresponding Author has the right to grant on behalf of all authors and does grant on behalf of all authors to the Publishers and its licensees in perpetuity, in all forms, formats and media (whether known now or created in the future), to i) publish, reproduce, distribute, display and store the Contribution, ii) translate the Contribution into other languages, create adaptations, reprints, include within collections and create summaries, extracts and/or, abstracts of the Contribution, iii) create any other derivative work(s) based on the Contribution, iv) to exploit all subsidiary rights in the Contribution, v) the inclusion of electronic links from the Contribution to third party material where-ever it may be located; and, vi) licence any third party to do any or all of the above."

1  
2  
3  
4 This research received no specific grant from any funding agency in the public, commercial or not-  
5 for-profit sectors  
6

7  
8 **Ethics:** This is a retrospective registry-based study. Data were anonymised before the authors  
9 assessed them for the purpose of the study. As no data was collected directly from the patients,  
10 according to Finnish regulations no ethical approval was needed. The study and data  
11 collection was approved in the IRB of Abdominal center, Helsinki University Hospital and in the IRB  
12 of City of Helsinki.  
13

14  
15 **Keywords:** chronic wound, leg ulcer, foot ulcer, wound management, wound aetiology, primary  
16 care, diagnostic process, diagnostic delay, clinical pathway  
17

18 **Words** 4632  
19  
20  
21  
22  
23  
24  
25  
26  
27  
28  
29  
30  
31  
32  
33  
34  
35  
36  
37  
38  
39  
40  
41  
42  
43  
44  
45  
46  
47  
48  
49  
50  
51  
52  
53  
54  
55  
56  
57  
58  
59  
60

1  
2  
3  
4  
5  
6  
7  
8  
9  
10  
11  
12  
13  
14  
15  
16  
17  
18  
19  
20  
21  
22  
23  
24  
25  
26  
27  
28  
29  
30  
31  
32  
33  
34  
35  
36  
37  
38  
39  
40  
41  
42  
43  
44  
45  
46  
47  
48  
49  
50  
51  
52  
53  
54  
55  
56  
57  
58  
59  
60

## Abstract

**Objectives:** Exact wound diagnosis is essential for successful wound management and a holistic care of the patient suffering from a wound. Wound management has been traditionally seen as a nursing area, but this can lead to considerable delays in wound diagnostics. A diagnostic delay has been recognised as an element of diagnostic error, which, in turn, affects patient safety. The aim of this cohort study was to examine diagnostic delays of chronic wound within primary care.

**Setting:** A specialised diagnostic unit, a wound care team, was established in the primary health care with the objective of reducing diagnostic and treatment delays in primary care.

**Participants:** The data consists of 197 consecutive patients attending their first appointment with the wound care team in 2016. The collected data included basic demographics, information about the clinical pathway, including doctor's appointments in primary and specialised care, as well as the ICD-10 diagnostic codes.

**Primary and secondary outcome measures:** The diagnostic delays were calculated in days and divided into three groups: 1) patient-related delay, 2) diagnostic delay and 3) organisational delay.

**Results:** The median duration of a patient-related delay was two days (IQR 0-14), whereas a physician's first evaluation was performed at a median of 8 (1-32) days from wound appearance and the correct diagnosis by the wound care team was established in a median of 57 (33-100) days. The organisational delay from first contact to diagnosis was a median of 41 (22-80) days. Only one in three patients had a diagnostic delay of less than 4 weeks.

**Conclusions:** According to this study, the diagnostic delay occurs within primary care, as an organisational delay from first contact to correct diagnosis. It is possible to arrange an optimal pathway of care in which a holistic wound care process starts within primary care.

1  
2  
3  
4  
5  
6  
7 **Bullet points of the study:**  
8

9 **Strengths and limitations of this study:**  
10

11 Strengths of the study include a unique data which contain primary care patients suffering from  
12 chronic wounds.  
13

14 Strengths include also systematic and detailed data review and collection.  
15

16 Limitations include the possibility of interpretation bias.  
17

18 Limitations include also the possibility of error in defining the moment of “the right diagnosis”.  
19

20 There is not input for Patient and Public Involvement in the study design, which could be seen as a  
21 limitation.  
22  
23  
24  
25  
26  
27  
28  
29  
30  
31  
32  
33  
34  
35  
36  
37  
38  
39  
40  
41  
42  
43  
44  
45  
46  
47  
48  
49  
50  
51  
52  
53  
54  
55  
56  
57  
58  
59  
60

## A COHORT STUDY OF DIAGNOSTIC DELAY IN THE CLINICAL PATHWAY OF PATIENTS WITH CHRONIC WOUNDS IN THE PRIMARY CARE SETTING

### Introduction

Chronic wounds pose a significant burden to health care, constituting roughly 2%–6% of all health care costs (1-3). According to a recent study in the UK, the annual prevalence of wounds increased by 71% between 2012/2013 and 2017/2018 and patient management costs increased by 48% in real terms (4). In addition to costs, chronic wounds cause substantial suffering at the individual level, leading to an impaired quality of life, social isolation and mental health problems (5-7). Wound management can be successful only when the wound is correctly diagnosed and treated accordingly (8,9). Wound care has been traditionally viewed as measures related to the assessment of the wound bed, which can obscure the importance of the holistic care of the patient (10).

In many European countries, wound patients are first seen in primary care by general practitioners (GPs) or nurses (11). This poses a significant challenge to primary care: wound patients should receive a timely evaluation by a qualified health care professional who can make the correct diagnosis, plan holistic treatment and make the necessary referrals (12). This process should aim to avoid diagnostic error, which has been recognised by the World Health Organization (WHO) as a global challenge to patient safety (13). Diagnostic error includes an incorrect or delayed diagnosis, which leads to patient harm or to inappropriate or delayed treatment. The diagnostic errors mainly occur within primary care or at the emergency department, where physicians lack the appropriate tools and sufficient time to make accurate decisions (14, 15).

In 2013, a special wound care team was established in the primary health care system of the Helsinki area. The wound care team consists of a wound care nurse and a general practitioner specialised in wound care. This team has the possibility to consult a podiatrist and/or vascular surgeon. Patients are referred to a wound care team consultation from all primary care units: health centres, home care units and nursing homes. The instructions for the primary care personnel were to react early and refer patients suffering from a non-healing wound within (2–)4 weeks of wound appearance in order to have the wound appropriately diagnosed. The main focus of the wound care team was to discover the correct diagnosis as early as possible and, thereafter, to initiate proper treatment accordingly.

The purpose of this study was to evaluate the delay in the diagnostic process in the clinical pathway of wound patients who were referred for a consultation by the wound care team during 2016. The delays were divided into system-related and patient-related delays.

### Material and methods



1  
2  
3 This prospective cohort study analysed the characteristics and medical history of 197 consecutive  
4 patients who visited the wound care team in primary health care during 2016. The information  
5 was collected at the first wound care team appointment.  
6

7  
8 Data were collected from electronic patient records. The collected data consisted of patients'  
9 background factors (sex, age, comorbidities, medication, previous wounds, state of mobility and  
10 living standards, need of home care, smoking, blood sugar levels and lipids), as well as the date of  
11 wound appearance, the date of the patient's first contact with a primary care unit and physician's  
12 appointment, the date of consulting the wound care team, and the date of admission to a  
13 specialist care unit if needed. In order to analyse the diagnostic process, additional information  
14 was collected on signs of infection and bacterial swab results, on whether the ankle brachial index  
15 (ABI) was measured, or pulse palpation occurred, or whether neuropathy was detected with a  
16 monofilament test. Observations of oedema and any blood test analyses regarding the wound  
17 were also recorded. Furthermore, information was gathered from radiological examinations, if  
18 performed, as well as any further investigations within specialist care, such as toe pressure and  
19 angiography results. The treatment plan was evaluated and compared to the diagnostic methods  
20 and the ICD-10 code. (Supplementary Table 1)  
21  
22  
23  
24

25  
26 Delays were calculated at different points of the care pathway, starting from wound appearance.  
27 The different types of delays included: 1) patient-related delay (time from wound appearance to  
28 the patient's first contact with health care providers), 2) diagnostic delay (time from the onset of  
29 the wound to the first physician's appointment where the initial diagnosis was made), and 3)  
30 organisational delays within primary care in arriving at the correct diagnosis and treatment (from  
31 the first contact with the primary health care unit to the wound care team consultation). Some  
32 patients needed a referral to a specialist consultation, his delay was also considered.  
33  
34

35  
36 Diagnostic codes were collected as ICD-10 codes and we compared to the diagnoses made by the  
37 primary care physician, by the wound care team physician and by the specialist. As the number of  
38 different diagnostic codes was high, we categorised the diagnoses into ten groups (Table 1, Figures  
39 1a and 1b). In the grouping process, we also included, in addition to the diagnostic code,  
40 information on how the wound had appeared and which diagnostic tools had been used to arrive  
41 at the specific conclusion and treatment plan.  
42  
43  
44  
45  
46  
47  
48  
49  
50  
51  
52  
53  
54  
55  
56  
57  
58  
59  
60

Table 1. Categorisation and diagnostic variation in the clinical pathway of a patient with a wound.

| Diagnostic categories               | Primary care physician (n = 155) | Wound care team physician (n = 197) | Specialist care physician (n = 111) |
|-------------------------------------|----------------------------------|-------------------------------------|-------------------------------------|
| No diagnosis*                       | 26                               | 2                                   | 1                                   |
| Arterial wound                      | 4                                | 16                                  | 26                                  |
| Venous or oedematous ulcer          | 15                               | 57                                  | 17                                  |
| Diabetic foot ulcer                 | 4                                | 24                                  | 15                                  |
| Pressure ulcer                      | 12                               | 29                                  | 9                                   |
| Post-traumatic wound                | 16                               | 23                                  | 3                                   |
| Atypical wound                      | 0                                | 8                                   | 7                                   |
| Mixed-aetiology ulcer               | 0                                | 7                                   | 3                                   |
| Infectious wound                    | 42                               | 11                                  | 10                                  |
| Foot malformation or pressure ulcer | 0                                | 7                                   | 1                                   |
| Wound of unspecified aetiology      | 36                               | 13                                  | 19                                  |

\*The category was defined as 'no diagnosis' when a patient had been seen by a physician but there was no ICD-10-coded diagnosis in the patient records.

1  
2  
3  
4  
5 In order to avoid bias caused by outliers, 16 patients whose wound had persisted for over 365  
6 days prior to the wound team consultation were excluded from the delay analysis.  
7

### 8 *Patient and public Involvement*

9

10 No patient or public involvement has been occurred in planning, managing, designing or carrying  
11 out this research.  
12  
13

### 14 **Results**

15

16 A total of 197 patients were included in the study. The mean age was 71 years, and 106 (53,5%)  
17 patients were female. The basic demographics and risk factors of the patients are reported in  
18 Tables 2-3.  
19  
20  
21  
22  
23  
24  
25  
26  
27  
28  
29  
30  
31  
32  
33  
34  
35  
36  
37  
38  
39  
40  
41  
42  
43  
44  
45  
46  
47  
48  
49  
50  
51  
52  
53  
54  
55  
56  
57  
58  
59  
60

Table 2. Basic demographics.

|                                  | Female(n) | %    | Male (n) | %    | Total (n) | %    |
|----------------------------------|-----------|------|----------|------|-----------|------|
| Sex                              | 106       | 53.8 | 91       | 46.2 | 197       | 100  |
| Age (y)                          |           |      |          |      |           |      |
| Mean                             | 78        | 39.6 | 69       | 34.0 | 147       | 36.0 |
| Median                           | 80        | 40.6 | 73       | 37.1 | 153       | 40.8 |
| Mobility (n)                     |           |      |          |      |           |      |
| walking                          | 38        | 19.3 | 56       | 28.4 | 94        | 47.7 |
| walking with assistance device   | 33        | 16.8 | 20       | 10.2 | 53        | 26.9 |
| walking with device only indoors | 16        | 8.1  | 5        | 2.5  | 21        | 10.7 |
| wheelchair                       | 11        | 5.6  | 8        | 4.1  | 19        | 9.6  |
| bedridden                        | 8         | 4.1  | 2        | 1.0  | 10        | 5.1  |
| Residence (n)                    |           |      |          |      |           |      |
| home                             | 57        | 28.9 | 73       | 37.1 | 130       | 66.0 |
| home with home care              | 30        | 15.2 | 12       | 6.1  | 42        | 21.3 |
| assisted living facility         | 14        | 7.1  | 5        | 2.5  | 19        | 9.6  |
| 24/7 care nursing home           | 5         | 2.5  | 1        | 0.5  | 6         | 3.0  |

Table 3 Description of the sample (n = 197, % of total) in individuals; comorbidities and risk factors.

| Comorbidities                         | Female (n) | %    | Male (n) | %    | Total (n) | %    | p-value*  |
|---------------------------------------|------------|------|----------|------|-----------|------|-----------|
| Hypertension                          | 60         | 30.5 | 50       | 25.4 | 110       | 55.8 |           |
| Heart failure                         | 25         | 12.7 | 11       | 5.6  | 36        | 18.3 | p = 0.044 |
| Ischaemic heart disease               | 13         | 6.6  | 10       | 5.1  | 23        | 11.7 |           |
| Atrial fibrillation                   | 37         | 18.8 | 24       | 12.2 | 61        | 31.0 |           |
| Respiratory condition                 | 27         | 13.7 | 11       | 5.6  | 38        | 19.3 |           |
| Cancer                                | 14         | 7.1  | 14       | 7.1  | 28        | 14.2 |           |
| Mental Health condition               | 9          | 4.6  | 9        | 4.6  | 18        | 9.1  |           |
| Dementia/memory disorder              | 25         | 12.7 | 9        | 4.6  | 34        | 17.3 | p = 0.013 |
| Diabetes                              | 30         | 15.2 | 47       | 23.9 | 77        | 39.1 | p < 0.001 |
| Peripheral arterial disease           | 16         | 8.1  | 24       | 12.2 | 40        | 20.3 | p = 0.042 |
| Kidney malfunction                    | 12         | 6.1  | 15       | 7.6  | 27        | 13.7 |           |
| Rheumatoid arthritis                  | 15         | 7.6  | 6        | 3.0  | 21        | 10.7 | p = 0.091 |
| Liver malfunction                     | 0          | 0.0  | 6        | 3.0  | 6         | 3.0  | p = 0.007 |
| Spinal stenosis                       | 5          | 2.5  | 3        | 1.5  | 8         | 4.1  |           |
| Gout                                  | 3          | 1.5  | 8        | 4.1  | 11        | 5.6  | p = 0.064 |
| Haematological condition              | 5          | 2.5  | 6        | 3.0  | 11        | 5.6  |           |
| Chronic pain disorder                 | 2          | 1.0  | 0        | 0.0  | 2         | 1.0  |           |
| Urinary condition                     | 4          | 2.0  | 10       | 5.1  | 14        | 7.1  | p = 0.045 |
| Cerebrovascular disorder              | 15         | 7.6  | 13       | 6.6  | 28        | 14.2 |           |
| Dermatological disease                | 3          | 1.5  | 2        | 1.0  | 5         | 2.5  |           |
| Musculoskeletal disorder              | 21         | 10.7 | 7        | 3.6  | 28        | 14.2 | p = 0.018 |
| No comorbidities                      | 3          | 1.5  | 4        | 2.0  | 7         | 3.6  |           |
| Risk factors                          | Female (n) | %    | Male (n) | %    | Total (n) | %    | p-value*  |
| Previous wounds                       | 46         | 23.4 | 50       | 25.4 | 96        | 48.7 |           |
| Previous DVT                          | 9          | 4.6  | 1        | 0.5  | 10        | 5.1  | p = 0.020 |
| venous insufficiency                  | 9          | 4.6  | 7        | 3.6  | 16        | 8.1  |           |
| chronic oedema                        | 3          | 1.5  | 2        | 1.0  | 5         | 2.5  |           |
| chronic cellulitis                    | 10         | 5.1  | 5        | 2.5  | 15        | 7.6  |           |
| previous amputation                   | 4          | 2.0  | 1        | 0.5  | 5         | 2.5  |           |
| Smoking (n)                           | 13         | 6.6  | 28       | 14.2 | 41        | 20.8 | p = 0.001 |
| Drug abuse                            | 2          | 1.0  | 5        | 2.5  | 7         | 3.6  | p = 0.010 |
| Alcohol abuse                         | 3          | 1.5  | 11       | 5.6  | 14        | 7.1  |           |
| Overweight (BMI 24–30)                | 59         | 29.9 | 62       | 31.5 | 121       | 61.4 |           |
| Obesity (BMI over 30)                 | 26         | 13.2 | 29       | 14.7 | 55        | 27.9 |           |
| High cholesterol (diagnosis)          | 22         | 11.2 | 23       | 11.7 | 45        | 22.8 |           |
| LDL over 3.0                          | 23         | 11.7 | 19       | 9.6  | 42        | 21.3 |           |
| Joint malformation                    | 8          | 4.1  | 3        | 1.5  | 11        | 5.6  | p = 0.010 |
| Neuropathy (diagnostic coded)         | 8          | 4.1  | 18       | 9.1  | 26        | 13.2 | p < 0.001 |
| Neuropathy (monofilament test posit.) | 32         | 16.2 | 54       | 27.4 | 86        | 43.7 |           |
| MRSA                                  | 2          | 1.0  | 6        | 3.0  | 8         | 4.1  | p = 0.048 |

|    |                   |            |     |            |     |                      |
|----|-------------------|------------|-----|------------|-----|----------------------|
| 1  |                   |            |     |            |     |                      |
| 2  |                   |            |     |            |     |                      |
| 3  | hemiplegia        | 2          | 1.0 | 2          | 1.0 | 4 2.0                |
| 4  | HbA1c(n=153)      |            |     |            |     |                      |
| 5  | Mean (SD)         | 43 (12.9)  |     | 49 (16.8)  |     | 46(15.1) p = 0.018~  |
| 6  | Median (IQR)      | 40         |     | 43         |     | 41(37 - 52)          |
| 7  | BMI(n=178)        |            |     |            |     |                      |
| 8  | Mean(SD)          | 27.4 (8.2) |     | 29.0 (6.2) |     | 28 (7.4)             |
| 9  | Median            | 26         |     | 28         |     | 26 (23 - 32)         |
| 10 | fP-Kol-LDL(n=169) |            |     |            |     |                      |
| 11 | Mean(SD)          | 2.5 (0.83) |     | 2.4 (0.86) |     | 2.5 (0.84)           |
| 12 | Median            | 2.4        |     | 2.3        |     | 2.4 (1.8-3.0)        |
| 13 | fP-Gluk(n=173)    |            |     |            |     |                      |
| 14 | Mean(SD)          | 6.0 (1.8)  |     | 7.3 (3.4)  |     | 6.6 (2.7) p = 0.002~ |
| 15 | Median            | 5.8        |     | 6.7        |     | 5.9 (5.3-6.9)        |

\*Pearsons chi-squared, difference between female and male patients

~One-way ANOVA test

1  
2  
3 The majority of the patients were living at home (n = 172; 86.9%) either without any support  
4 (n = 130) or with home care (n = 42). The patients' living status is presented in Table 2. Almost half  
5 of the patients had had wounds earlier (48.7%). As regards comorbidities, 39.1% had diabetes,  
6 11.7% ischemic heart disease, 17.3% memory disorders and 9.1% a mental health condition. Only  
7 3.6% had no comorbidities. Overweight (61.4%), obesity (27.9%) and neuropathy (43.4%) were  
8 relatively common. Venous insufficiency or a previous deep venous thrombosis had been  
9 diagnosed in only 13.2%. As can be seen in Tables 3 and 4, the patients had several co-morbidities  
10 and heterogenous medications. Almost half of the patients used analgesics (44.7% NSAIDs or  
11 paracetamol and 15.2% opioids), whereas different psychopharmaceuticals were used by 11.7%–  
12 17.8% of the patients.  
13  
14  
15  
16  
17  
18  
19  
20  
21  
22  
23  
24  
25  
26  
27  
28  
29  
30  
31  
32  
33  
34  
35  
36  
37  
38  
39  
40  
41  
42  
43  
44  
45  
46  
47  
48  
49  
50  
51  
52  
53  
54  
55  
56  
57  
58  
59  
60

For peer review only

Table 4. Description of the sample (n = 197) in individuals; medication.

| Medication                         | Female (n) | %    | Male (n) | %    | Total (n) | %    | chi-square |
|------------------------------------|------------|------|----------|------|-----------|------|------------|
| <b>Cardiac and vessel medicine</b> |            |      |          |      |           |      |            |
| Anticoagulant                      | 41         | 20.8 | 26       | 13.2 | 67        | 34.0 | p = 0.164  |
| Antithrombotic                     | 29         | 14.7 | 28       | 14.2 | 57        | 28.9 |            |
| b-blocker                          | 57         | 28.9 | 41       | 20.8 | 98        | 49.7 | p = 0.018  |
| Diuretic                           | 45         | 22.8 | 32       | 16.2 | 77        | 39.1 |            |
| Ca-blocker                         | 27         | 13.7 | 31       | 15.7 | 58        | 29.4 |            |
| ACE-blocker                        | 38         | 19.3 | 47       | 23.9 | 85        | 43.1 |            |
| Statin                             | 40         | 20.3 | 35       | 17.8 | 75        | 38.1 |            |
| <b>Diabetes medicine</b>           |            |      |          |      |           |      |            |
| Oral diabetes medicine             | 16         | 8.1  | 21       | 10.7 | 37        | 18.8 | p = 0.134  |
| Insulin                            | 12         | 6.1  | 30       | 15.2 | 42        | 21.3 | p < 0.001  |
| <b>Psychopharmaceuticals</b>       |            |      |          |      |           |      |            |
| Dementia medicine                  | 16         | 8.1  | 6        | 3.0  | 22        | 11.2 | p = 0.066  |
| Antidepressant                     | 14         | 7.1  | 11       | 5.6  | 25        | 12.7 |            |
| Benzodiazepine                     | 13         | 6.6  | 10       | 5.1  | 23        | 11.7 | p = 0.135  |
| Sleeping pills                     | 23         | 11.7 | 12       | 6.1  | 35        | 17.8 |            |
| Analgesia(mild)                    | 57         | 28.9 | 31       | 15.7 | 88        | 44.7 | p = 0.008  |
| Opiates                            | 18         | 9.1  | 12       | 6.1  | 30        | 15.2 |            |
| <b>Immune system medicine</b>      |            |      |          |      |           |      |            |
| Cancer medicine                    | 2          | 1.0  | 3        | 1.5  | 5         | 2.5  | p = 0.124  |
| Immunosuppressive                  | 11         | 5.6  | 4        | 2.0  | 15        | 7.6  |            |
| Cortisone per oral                 | 12         | 6.1  | 4        | 2.0  | 16        | 8.1  | p = 0.083  |
| Cortisone cream                    | 4          | 2.0  | 0        | 0.0  | 4         | 2.0  | p = 0.064  |
| <b>Supplements</b>                 |            |      |          |      |           |      |            |
| Thyroxin                           | 16         | 8.1  | 3        | 1.5  | 19        | 9.6  | p = 0.006  |
| Ca-supplement                      | 46         | 23.4 | 16       | 8.1  | 62        | 31.5 |            |
| Folic acid                         | 7          | 3.6  | 3        | 1.5  | 10        | 5.1  | p = 0.013  |
| B12-supplement                     | 11         | 5.6  | 12       | 6.1  | 23        | 11.7 |            |
| Vitamin D suppl.                   | 44         | 22.3 | 22       | 11.2 | 66        | 33.5 |            |
| Nutrition suppl.                   | 6          | 3.0  | 2        | 1.0  | 8         | 4.1  |            |
| Mg suppl.                          | 7          | 3.6  | 4        | 2.0  | 11        | 5.6  |            |
| K suppl.                           | 11         | 5.6  | 9        | 4.6  | 20        | 10.2 |            |
| <b>Other</b>                       |            |      |          |      |           |      |            |
| Inhaler/nebulizer                  | 26         | 13.2 | 16       | 8.1  | 42        | 21.3 | p = 0.030  |
| Proton pump inhibitor              | 39         | 19.8 | 20       | 10.2 | 59        | 29.9 |            |
| Urine medicine                     | 8          | 4.1  | 12       | 6.1  | 20        | 10.2 | p = 0.190  |
| Skin cream                         | 19         | 9.6  | 10       | 5.1  | 20        | 10.2 |            |



## Diagnostics

Forty-two (21.3%) patients were not seen by a primary care physician before they visited the wound care team, meaning that the diagnostic process was not even started before this visit. Of the 155 patients who had been seen by a physician prior to the wound care team, 129 (83.2%) had a recorded diagnosis code (ICD-10), while 26 (16.8%) patients remained undiagnosed. Thus, 34.5% of the patients (n = 68) received their first diagnosis by the wound care team.

Out of the patients who were seen by a primary care physician, 85 (58.8%) had no delay (median 0 days), meaning that the patients visited an emergency room and were seen by a physician immediately. The diagnoses for these patients mainly comprised infectious wounds (n = 30, 35.3%) and wounds with no specific cause (n = 21, 24.7%), while a diagnostic code was not recorded for 10.6% (n = 9). Hence, 15 patients had traumatic wounds and saw the physician at an acute appointment.

Of those patients who saw a primary care physician (n = 155), 36.2% (n = 56) had clinical signs of infection according to the patient records. However, as many as 94 (60.6%) patients were treated with antibiotics, and 82 (52.9%) had a bacterial swab taken.

Of the 129 patients who had a diagnosis before the first appointment with the wound care team, the same diagnosis was made by the team and the primary care physician in 59 (45.7%) of the cases. The concordant diagnoses most often entailed pressure ulcers, infectious ulcers, as well as venous and post-traumatic ulcers. Specialist care was received by 111 patients. The same diagnosis (ICD-10) was made by all three points in the clinical pathway in only 24 (12.2%) cases, and the majority of these comprised infectious ulcers, followed by a venous aetiology and wounds without a specific diagnosis. (Table 5)

Table 5. Differentiation of the diagnoses when they remained unchanged or were revised over the clinical pathway.

| Categorised diagnostic groups       | Diagnoses that remained unchanged |                                        |                                        | Diagnoses that were revised        |                                       |
|-------------------------------------|-----------------------------------|----------------------------------------|----------------------------------------|------------------------------------|---------------------------------------|
|                                     | within primary care               | throughout the entire clinical pathway | by wound care team and specialist care | Primary care physician's diagnosis | Wound care team physician's diagnosis |
| Arterial wound                      | 0                                 | 0                                      | 16                                     | 4                                  | 7                                     |
| Venous or oedematous ulcer          | 13                                | 5                                      | 17                                     | 2                                  | 24                                    |
| Diabetic foot ulcer                 | 2                                 | 1                                      | 13                                     | 2                                  | 11                                    |
| Pressure ulcer                      | 11                                | 3                                      | 9                                      | 1                                  | 8                                     |
| Post-traumatic wound                | 15                                | 3                                      | 3                                      | 0                                  | 2                                     |
| Atypical wound                      | 0                                 | 0                                      | 7                                      | 0                                  | 4                                     |
| Mixed-aetiology wound               | 0                                 | 0                                      | 2                                      | 0                                  | 3                                     |
| Infectious wound                    | 10                                | 8                                      | 9                                      | 32                                 | 1                                     |
| Foot malformation or pressure ulcer | 0                                 | 0                                      | 1                                      | 0                                  | 5                                     |
| Wound of unspecified aetiology      | 8                                 | 4                                      | 6                                      | 27                                 | 3                                     |

1  
2  
3  
4  
5 Of the patients who visited a specialist, the same diagnosis was made by the wound care team  
6 physician and the specialist in 75.5% of the cases (Table 5 and 6). The concordant diagnoses most  
7 often comprised diabetic foot ulcers (20.5%), arterial ulcers (19.3%) and venous or oedematous  
8 ulcers (15.7%). In the remaining 24.6% (n = 27) of the patients, the diagnosis made by the wound  
9 care team was revised in specialist care, mostly comprising arterial ulcers (40.7%) that were  
10 usually referred for further investigations with a suspicion of an arterial wound. The ulcers that  
11 turned out to be arterial wounds were diagnosed by the wound care team as diabetic foot ulcers  
12 (14.8%), wounds of mixed aetiology (18.5%), foot malformations (14.8%) and oedematous ulcers  
13 (37.0%).  
14  
15  
16

17 Post-traumatic wounds were categorised into one category. In the primary care setting, there  
18 were 16 post-traumatic ulcers, 15 of which were assessed in the emergency room (ER).  
19  
20  
21  
22  
23  
24  
25  
26  
27  
28  
29  
30  
31  
32  
33  
34  
35  
36  
37  
38  
39  
40  
41  
42  
43  
44  
45  
46  
47  
48  
49  
50  
51  
52  
53  
54  
55  
56  
57  
58  
59  
60

Table 6. Diagnostic differentiation through the treatment pathway.

|                           | The same diagnosis~<br>throughout entire<br>treatment pathway | The same diagnosis<br>within primary care~~ | The same diagnosis by<br>wound care team and<br>specialist |
|---------------------------|---------------------------------------------------------------|---------------------------------------------|------------------------------------------------------------|
| 1 = the same              | 24                                                            | 60                                          | 83                                                         |
| 0 = different             | 47                                                            | 67                                          | 27                                                         |
| total                     | 71                                                            | 127 <sup>#</sup>                            | 110                                                        |
| % of diagnosed*^ patients | 21,8                                                          | 47,2                                        | 75,5                                                       |
| % of 197 (whole sample)   | 12,2                                                          | 30,5                                        | 42,1                                                       |

~ treatment pathway: primary care physician, wound care team (physician) and specialist care.

~~primary care physician and wound care team (physician)

\*155 patients visited a doctor in primary care before the appointment with the wound care team, but only 129 patients were diagnosed.

^110 patients were diagnosed in specialist care.

# 2 patients were undiagnosed in the wound care team. They were of those of the 129 diagnosed in the primary care

## Delays

The median time from wound appearance to the first health care contact was 2 days (IQR 0–14 days, range 0–351 days) and from wound appearance to the first evaluation by a physician 8 days (IQR 1–32 days, range 0–314 days). The majority of the patients had their first health care contact at the emergency department where a physician also examined the patient, or at the district nurse's office at a health centre with the possibility of an immediate physician's consultation. The median time from the onset of the wound to the first wound care team appointment was 57 days (IQR 33–100 days, range 2–358 days). The median time between the first health care contact and the wound care team appointment was 41 days (IQR 22–80 days; range 1–484 days). Only one in three patients (n = 61) had an organisational delay of less than 4 weeks between the first contact with health services and the appointment with the wound care team.

Half of the patients (n = 113, 57.4%) were referred to a secondary health care unit to be seen by a specialist, most often by a vascular surgeon (n = 67), followed by a plastic surgeon (n = 43) and a dermatologist (n = 13). Twenty-one (18.6%) patients were referred to two or more specialists. The median delay from the first appointment with the wound care team to the appointment with the secondary health care specialist was 21 days (IQR 8–55, min–max -58–235; range 293 days).

The median time from the appearance of the wound to the final diagnosis was 57 days (IQR 33–101; min–max 2–358; range 356 days).

The delays in different the subgroups are presented in Table 7.

Table 7. Delays in different subgroups. Figures are presented as medians (IQR; Min–Max; Range)

Delays are calculated and analysed with the inclusion criterion 'wound appearance within 365 days prior to wound care team appointment'.

|                                            | n   | Wound appearance - first contact to health care | Wound appearance to first physician evaluation | Wound appearance to wound care team | Delay from first contact to wound care team (organizational delay within primary care) | Delay Wound care team to specialist care | Mann-Whitney-U            |
|--------------------------------------------|-----|-------------------------------------------------|------------------------------------------------|-------------------------------------|----------------------------------------------------------------------------------------|------------------------------------------|---------------------------|
| All patients                               | 182 | 2 (0–14;0–351;351)                              | 8(1–32;0–314;314)                              | 57(33–101;2–358;356)                | 42(22–80;1–484;483)                                                                    | 21(7–52;-58–252;414)                     |                           |
| Male                                       | 81  | 3 (0–24;0–351;351)                              | 9(1–37;0–314;314)                              | 69(37–111;2–358;356)*               | 44(23–85;2–484;482)                                                                    | 23(3–48;-58–235;293)                     | *p = 0.058                |
| Female                                     | 101 | 1 (0–8;0–295;295)                               | 8(1–24;0–295;295)                              | 54(30–96;2–306;304)*                | 41(22–76;1–264;263)                                                                    | 20(8–58;0–176;176)                       |                           |
| Age under 65 y (1)                         | 46  | 6 (1–27;0–298;298)*                             | 9(3–30;0–142;142)                              | 62(36–100;11–320;309)               | 37(22–76;6–382;376)                                                                    | 28(14–48;1–182;181)                      | *1 vs 2; p = 0.005        |
| Age 65–80 y (2)                            | 62  | 0 (0–14;0–258;258)*                             | 10(0–38;0–314;314)                             | 61(41–106;10–337;327)               | 49(25–88;4–264;260)                                                                    | 16(2–50;0–235;235)                       | *1 vs 3; p = 0.003        |
| Age over 80 y (3)                          | 74  | 1 (0–8;0–351;351)*                              | 7(1–32;0–295;295)                              | 53,5(30–98;2–358;356)               | 40(22–78;1–484;483)                                                                    | 16(6–56;-58–167;225)                     |                           |
| DM+                                        | 72  | 1 (0–15;0–142;142)                              | 10(1–37;0–142;142)                             | 59(36–102;2–324;322)                | 45(26–75;2–245;243)                                                                    | 14(3–48;0–235;235)                       | no statistical difference |
| DM-                                        | 110 | 2 (0–13;0–351;351)                              | 7(1–32;0–314;314)                              | 56(31–101;4–358;354)                | 40(22–84;1–482;483)                                                                    | 26(8–56;-58–167;225)                     |                           |
| Living at home                             | 160 | 2 (0–15;0–351;351)                              | 9(1–33;0–314;314)                              | 57(33–102;2–358;356)                | 42(22–83;1–382;381)                                                                    | 20(5–48;0–235;235)*                      | *p = 0.010                |
| Living in institution                      | 22  | 1 (0–8;0–295;295)                               | 3(0–14;0–295;295)                              | 55(34–86;7–306;299)                 | 43(24–72;7–484;477)                                                                    | 56(16–143;-58–176;234)*                  |                           |
| Walking; outdoors                          | 134 | 3 (0–15;0–351;351)*                             | 8(1–27;0–246;246)                              | 56(33–97;4–358;354)                 | 40(22–76;1–382;381)                                                                    | 22(6–56;-58–235;293)                     | *p = 0.047                |
| Not-walking; staying indoors               | 48  | 0 (0–5;0–298;298)                               | 9(1–55;0–314;314)                              | 71(33–108;2–337;335)                | 54(24–94;2–484;482)                                                                    | 16(7–46;0–182;182)                       |                           |
| Delay before wound care team under 28 days | 61  | 6 (0–20;0–351;351)*                             | 7(3–24;0–295;295)                              | 26(19–41;2–358;356)*                | 18(12–22;1–28;27)                                                                      | 22(4–42;0–167;167)                       | *p < 0.001                |
| Delay before wound care team over 28 days  | 121 | 0 (0–8;0–258;258)                               | 9(0–34;0–314;314)                              | 73(51–112;29–337;308)               | 70(42–101;29–484;455)                                                                  | 20(7–55;-58–235;293)                     |                           |
| Unchanged diagnosis (PC-WT-spec.)          | 20  | 3 (2–12;0–246;246)                              | 7(3–19;0–246;246)                              | 51(32–80;5–267;262)                 | 35(20–74;2–186;184)                                                                    | 23(8–45;0–89;89)                         |                           |
| Different diagnosis                        | 43  | 1 (0–17;0–258;258)                              | 8(0–42;0–314;314)                              | 71(37–111;4–337;333)                | 57(30–89;1–245;244)                                                                    | 18(7–98;0–235;235)                       |                           |
| The same DG within primary care            | 55  | 2 (0–7;0–246;246)                               | 3(1–18;0–246;246)                              | 52(31–78;5–267;262)*                | 40(20–71;2–186;184)                                                                    | 33(9–56;0–176;176)                       | *p=0.042                  |
| Different DG                               | 61  | 1 (0–24;0–258;258)                              | 17(1–56;0–314;314)                             | 73(37–126;4–337;333)                | 53(31–98;1–245;244)                                                                    | 15(7–64;0–235;235)                       |                           |

## Discussion

1  
2  
3 It is well-known that an early diagnosis of the underlying cause of a chronic wound is essential for  
4 wound healing and for avoiding amputations (8, 16, 17). However, there are only a few studies  
5 describing the importance of wound diagnosis and the deleterious effects of diagnostic delays (18-  
6 20). In the current study, we investigated the diagnostic processes and delays in wound care in the  
7 Helsinki area. The patients' first contact with health care services after wound appearance was  
8 prompt, the median delay being only 2 days. In stark contrast, it took 57 days from the appearance  
9 of the wound before the patient was seen by the wound care team for the first time. In our  
10 material, only 31.0% of the patients visited the wound care team within 4 weeks of the first health  
11 care appointment. This caused a significant delay in reaching the correct diagnosis of the wound.  
12 We also discovered that only 65.5% of all patients had a recorded wound diagnosis before the first  
13 wound care team appointment and that this diagnosis matched the final diagnosis in  
14 approximately 50% of the cases. Accordingly, in European countries, the delay in diagnosing  
15 diabetic foot ulcers (DFU) was over 3 weeks in 21%–34% of the patients. The shortest average  
16 time from event to diagnosis was 10 days in the UK, 14 days in Spain and France, and 20 days in  
17 Germany. (12)

23 In Finland, wound patients are evaluated and treated mainly during primary care appointments,  
24 including home care and nursing homes (21). In the mentioned European countries, the health  
25 care professionals who participate in the diagnostic process vary considerably. In the UK, only 6%  
26 of GPs completely agreed that the care and management of DFUs is the GP's responsibility, and  
27 22% did not diagnose DFUs. Instead, in 27% of the cases, district nurses made the diagnosis. In the  
28 UK, the approach seems more often to be multidisciplinary, as 49% of the GPs referred patients to  
29 a podiatrist if needed. In all four countries, GPs were able to refer DFU patients to specialised  
30 multidisciplinary clinics. (22)

34 In the UK, DFUs were diagnosed by a GP in only 45% of the cases, and most of the wounds were  
35 diagnosed by a district nurse or practice nurse (12).

38 The optimal treatment pathways for wound patients include patient surveillance and an early  
39 detection of wound healing problems. Errors in the pathway may lead to delays and,  
40 consequently, even fatal errors, such as amputations, in some patients. (17)

42 We took a closer look at the ICD-10 codes assessed by the primary care physicians, wound care  
43 team physician and specialists and found that they differed from each other significantly. This  
44 highlights the complexity of wound diagnostics. Surprisingly, only 12.2% of the patients had the  
45 same diagnosis throughout the whole pathway of care, and these mostly comprised infectious  
46 wounds. Based on our data, we assume that there was a significant overdiagnosis of infections in  
47 primary care, since an infectious wound was diagnosed in 32.6% of the cases and antibiotics were  
48 prescribed for 63.2% of the patients in the primary care setting. Similar results have been obtained  
49 in Sweden, where the use of a national wound register diminished the use of antibiotics (23).  
50 Evidence of difficulties in the diagnostics of wound infections is also found in a study of GPs  
51 recognising and treating wound infections – according to the results, GPs mostly desired further  
52 knowledge about when to start or stop treatment (81%–82%), about topical antimicrobials (80%–  
53 68%) and about when to prescribe antibiotics (82%–95%) (24).

1  
2  
3 Another diagnostic challenge was the diagnosis of an ischaemic wound and diabetic foot ulcer in  
4 primary care. Only four diabetic and arterial ulcers were diagnosed in primary care. In contrast,  
5 the wound care team diagnosed a DFU in 54 patients, and 26 patients were referred to a specialist  
6 when an ischaemic wound was suspected. This problem is also detected in a multi-centre study  
7 performed in four European countries. The researchers found that, even though GPs described  
8 neuropathy and peripheral arterial disease as cofactors in the DFU development, they investigated  
9 DFUs with additional tests in only half of the cases; this entailed monofilament tests in 21%–43%  
10 and, more often, pulse palpation or the measurement of the ankle brachial index in 78%–90% of  
11 the cases, but diabetic foot infection (DFI) was tested in only 7%–20% of the investigated cases.  
12  
13  
14  
15 (11)

16  
17 Our main finding was that there was an organisational delay in reaching a timely diagnosis. The  
18 time between wound appearance and the first contact with a physician was adequate, the median  
19 being 8 days, and two-thirds (58.8%, n = 85) of the patients had their first evaluation at the first  
20 contact with health services. This means that a physician's examination was mostly available at the  
21 emergency room or as a rapid consultation during a nurse's appointment at the health centre.  
22 However, our study shows that, among these patients, the initial physician's evaluation very  
23 seldom leads to a correct diagnosis and treatment.  
24  
25

26  
27 Regarding wound patients, emergency room assessment should include the three most important  
28 and acute aetiologies, such as infection, ischaemia and diabetes (25), but otherwise the  
29 emergency room might not be the optimal setting for diagnosing wounds.  
30

31  
32 Post-traumatic ulcers could be a subgroup of oedematous leg ulcers due to the same management  
33 approach, namely compression therapy, which should be assessed immediately after  
34 vascular/arterial causes have been ruled out. Hence, according to the present data, oedematous  
35 and post-traumatic ulcers accounted for 40.6% of all the ulcers and were treated with  
36 compression.  
37

38  
39 We found that the wound diagnostic process was good enough in the wound care team, as the  
40 diagnosis did not change for 75.5% of the patients who were referred by the team to specialist  
41 care. In the remaining 24.5%, in whom the diagnosis made by a specialist differed from the  
42 diagnosis made by the wound care team, the final diagnosis was confirmed using diagnostic tools  
43 that were not available in the health centre. In these cases, however, the wound care team often  
44 had a default diagnosis to base the referral on, and specialist care then responded to this idea,  
45 most often leading to the correct treatment. Indeed, the referral was very useful for these  
46 patients.  
47  
48

49  
50 On the other hand, there were ordinary delays in receiving a specialist evaluation, as the median  
51 delay was 21 days, where the largest differences were between the subgroups of patients living in  
52 institutions and those living at home. This might be explained by the advance care planning among  
53 nursing home residents. However, previous studies propose delays of less than two weeks in  
54 diagnosing arterial ulcers and DFUs to avoid leg losses (17). As a response to the challenge of  
55 timely referral to correct department for treatment there are globally several multidisciplinary  
56 wound clinics to have only one place to send a patient for a consultation (26,27,28).  
57  
58  
59  
60



1  
2  
3 Previous studies suggest that diagnostic errors are often preceded by common symptoms,  
4 followed by common diagnoses (29, 30). Studies have shown that the most frequent error is  
5 “premature closure”, meaning ‘the tendency to stop considering other possibilities after reaching  
6 a diagnosis’ (31, 32). In the UK, diagnosis- and assessment-related incidents were the highest  
7 causes of patient harm (29). As a conclusion, the ability to utilise differential diagnostic methods is  
8 key when diagnosing wound aetiologies. There is always a danger of diagnosing a wound  
9 incorrectly, if possibilities to perform differential diagnostics are lacking (19, 30).  
11

12  
13 As a solution, a broader range of differential diagnostic possibilities as regards the origin of the  
14 wound would probably help in the first evaluation and in avoiding diagnostic error and delay in the  
15 treatment (33-34). Our study shows that the problem for wound management lies in the primary  
16 care; i.e. wounds that should be referred to multidisciplinary care are not recognized. The solution  
17 is continuous education of primary care physicians and nurses focusing on basic differential  
18 diagnostics of chronic wounds instead of wound management *per se*. Education is needed also to  
19 bring up the awareness of the triage –remembering that also an acute wound may turn into a  
20 chronic wound which needs quick response and treatment. One practical tool to tackle these  
21 diagnostic challenges could be the use of checklists (35-37) and digitalized wound diagnostic tools  
22 (38, submitted for publication). It has been determined in other contexts that there are tools for  
23 avoiding fatal errors in differential diagnostics, such as existing guidelines and, to be regarded with  
24 a grain of salt, electronic aids in decision making (39-41).  
28

### 29 **Limitations**

30  
31 The limitations of this study are related to the variety of aetiologies behind chronic wounds. There  
32 are no generally agreed-upon diagnostic codes to be used for chronic wounds, and the  
33 differentiation potential is enormous. Most often wounds are coded as merely a wound of  
34 unspecified aetiology (L97, L98), or they are S-coded, which refers to a traumatic wound.  
35 Therefore, it is difficult to define when a diagnosis is correct or not.  
37

38  
39 Outliers also constituted a limitation of the study, as we could not include them in the data  
40 analysis. Some patients in the material had suffered from a wound for several years. Despite this,  
41 they were referred to the wound care team when it was established in 2013. In our delay analyses,  
42 we tried to avoid this bias by selecting patients whose wounds had appeared less than one year  
43 prior to the appointment with the wound care team.  
44

### 45 **Conclusion**

46  
47 It seems that the diagnostic delay of wound patients occurs within primary care. It is an  
48 organisational delay and causes patient harm, as the patients are not receiving a timely and  
49 correct diagnosis and treatment. Infectious wounds seem to be easy to detect, but there is a risk  
50 of overdiagnosis, leading to an overuse of antibiotics. However, primary care physicians seem to  
51 pay little attention to distinguishing arterial insufficiency or diabetic foot ulcers (DFU).  
52

53  
54 The delay before seeing a primary care physician was not substantial, but the physicians’  
55 differential diagnostic approaches did not cover peripheral arterial disease or diabetic foot ulcers.  
56 Consequently, the delay before being seen by the wound care team was over one month, which is  
57 a long time when treating diabetic foot ulcers, especially those of vascular origin.  
58  
59  
60

1  
2  
3 Based on our results, we propose that it is possible to arrange an optimal treatment pathway  
4 within a primary care setting, where a holistic wound care process is initiated, provided that there  
5 is organisational support, knowledge, skills and a multidisciplinary team available. It has been  
6 demonstrated that such an approach does not even require any additional resources, but rather a  
7 rearrangement of the patient care (16, 42). We also suggest that the specialist care clinics could  
8 play a supportive role in the treatment of complex wounds, while the primary care system could  
9 take responsibility for the holistic wound care.  
10  
11  
12

13 **Ethics:** Not applicable/No human participants included. This is a retrospective registry-based  
14 study. Data were anonymised before the authors assessed them for the purpose of the study. Due  
15 to the nature of the study ethical approval was not required for the study. Study was approved in  
16 the IRB of Abdominal center, Helsinki University Hospital and in the IRB of City of Helsinki.  
17  
18

19 **Contributorship statement:**

20  
21 Kirsti Ahmajärvi is the responsible guarantor of content and has contributed to the designing the  
22 study, conducting, collecting and analyzing the data, and reporting of the work described in the  
23 article.  
24

25  
26 Kirsi Isoherranen has contributed to the following parts of the study: design of the study, reporting  
27 and review and editing of the final manuscript.  
28

29  
30 Maarit Venermo has contributed to the following parts in this study: Design of the study, data  
31 analysis and interpretation, revisions to scientific content of the manuscript, review and editing of  
32 the final manuscript.  
33

34  
35 The corresponding author attests that all listed authors meet authorship criteria and that no  
36 others meeting the criteria have been omitted.  
37

38 **Competing interest:** All authors have completed the ICMJE uniform disclosure form  
39 at Helsinki and declare: Kirsi Isoherranen and Maarit Venermo have no support from any  
40 organisation for the submitted work, Kirsti Ahmajärvi has received a working grant from the  
41 University of Helsinki, The Finnish Wound Association and The Finnish Association for General  
42 Practice. ; no financial relationships with any organisations that might have an interest in the  
43 submitted work in the previous three years; no other relationships or activities that could appear  
44 to have influenced the submitted work.  
45  
46  
47

48 **Funding:** Kirsti Ahmajärvi has received a personal working grant from the University of Helsinki,  
49 The Finnish Wound Association and The Finnish Association for General Practice. This research  
50 received no specific grant from any funding agency in the public, commercial or not-for-profit  
51 sectors.  
52  
53

54 **Data sharing statement:** Data is not available in any system for data sharing.  
55  
56  
57  
58  
59  
60

## References:

1. Lindholm C, Searle R. Wound management for the 21st century: combining effectiveness and efficiency. *Int Wound J*. 2016;13:5-15.
2. Phillips CJ, Humphreys I, Fletcher J et al. Estimating the costs associated with the management of patients with chronic wounds using linked routine data. *Int Wound J*. 2016;13(6):1193-7.
3. Guest JF, Ayoub N, McIlwraith T et al. Health economic burden that different wound types impose on the UK's National Health Service. *Int Wound J*. 2017;14(2):322-30.
4. Guest JF, Fuller GW, Vowden P. Cohort study evaluating the burden of wounds to the UK's National Health Service in 2017/2018: update from 2012/2013. *BMJ open*. 2020;10(12):e045253-e.
5. Sen CK. Human Wound and Its Burden: Updated 2020 Compendium of Estimates. *Adv Wound Care (New Rochelle)*. 2021;10(5):281-92.
6. Herber OR, Schnepf W, Rieger MA. A systematic review on the impact of leg ulceration on patients' quality of life. *Health Qual Life Outcomes*. 2007;5:44.
7. Green J, Jester R, McKinley R et al. The impact of chronic venous leg ulcers: a systematic review. *J Wound Care*. 2014;23(12):601-12.
8. Mooij MC, Huisman LC. Chronic leg ulcer: does a patient always get a correct diagnosis and adequate treatment? *Phlebology*. 2016;31(1 Suppl):68-73.
9. Dean S. Leg ulcers - causes and management. *Aust Fam Physician*. 2006;35(7):480-4.
10. Atkin L, Bučko Z, Conde Montero E et al. Implementing TIMERS: the race against hard-to-heal wounds. *J Wound Care*. 2019;23(Sup3a):S1-s50.
11. Garcia-Klepzig JL, Sánchez-Ríos JP, Manu C et al. Perception of diabetic foot ulcers among general practitioners in four European countries: knowledge, skills and urgency. *J Wound Care*. 2018;27(5):310-9.
12. Sánchez-Ríos JP, García-Klepzig JL, Manu C et al. Referral of patients with diabetic foot ulcers in four European countries: patient follow-up after first GP visit. *J Wound Care*. 2019;28(Sup8):S4-s14.
13. Sheikh A, Donaldson L, Dhingra-Kumar N et al. Diagnostic Errors: *Technical Series on Safer Primary Care*. Geneva: World Health Organization; 2016. Licence: CC BY-NC-SA 3.0 IGO2016.
14. Kostopoulou O, Delaney BC, Munro CW. Diagnostic difficulty and error in primary care--a systematic review. *Fam Pract*. 2008;25(6):400-13.
15. Irving G, Neves AL, Dambha-Miller H et al. International variations in primary care physician consultation time: a systematic review of 67 countries. *BMJ Open*. 2017;7(10):e017902.
16. Laakso M, Honkasalo M, Kiiski J et al. Re-organizing inpatient care saves legs in patients with diabetic foot infections. *Diabetes Research and Clinical Practice*. 2017;125:39-46.
17. Noronen K, Saarinen E, Albäck A et al. Analysis of the Elective Treatment Process for Critical Limb Ischaemia with Tissue Loss: Diabetic Patients Require Rapid Revascularisation. *Eur J Vasc Endovasc Surg*. 2017;53(2):206-13.
18. Walker CM, Bunch FT, Cavros NG et al. Multidisciplinary approach to the diagnosis and management of patients with peripheral arterial disease. *Clin Interv Aging*. 2015;10:1147-53.
19. Eliassen A, Vandy F, McHugh J et al. Marjolin's ulcer in a patient with chronic venous stasis. *Ann Vasc Surg*. 2013;27(8):1182.e5-8.

- 1
- 2
- 3 20. Janowska A, Oranges T, Chiricozzi A et al. Synergism of Therapies After Postoperative
- 4 Autograft Failure in a Patient With Melanoma of the Foot Misdiagnosed as a Pressure Ulcer.
- 5 *Wounds*. 2018;30(4):E41-e3.
- 6
- 7 21. Ahmajärvi KM, Isoherranen KM, Mäkelä A et al. A change in the prevalence and the
- 8 etiological factors of chronic wounds in Helsinki metropolitan area during 2008-2016. *Int Wound J*.
- 9 2019;16(2):522-6.
- 10
- 11 22. Manu C, Lacopi E, Bouillet B et al. Delayed referral of patients with diabetic foot ulcers
- 12 across Europe: patterns between primary care and specialised units. *J Wound Care*.
- 13 2018;27(3):186-92.
- 14
- 15 23. Oien RF, Forssell HW. Ulcer healing time and antibiotic treatment before and after the
- 16 introduction of the Registry of Ulcer Treatment: an improvement project in a national quality
- 17 registry in Sweden. *BMJ open*. 2013;3(8):e003091-e.
- 18
- 19 24. Woo KY. Physicians' knowledge and attitudes in the management of wound infection. *Int*
- 20 *Wound J*. 2016;13(5):600-4.
- 21
- 22 25. Salava A, Isoherranen K. Rule of three I's: a mnemonic aid in undergraduate teaching of
- 23 lower limb wounds. *J Wound Care*. 2021;30(12):1030.
- 24
- 25 26. Gottrup F. A specialized wound-healing center concept: importance of a multidisciplinary
- 26 department structure and surgical treatment facilities in the treatment of chronic wounds. *Am J*
- 27 *surg*. 2004;187(5A):38S-43S.
- 28
- 29 27. Leon J, Bohn GA, DiDomenico L et al. Wound Care Centers: Critical Thinking and Treatment
- 30 Strategies for Wounds. *Wounds*. 2016;28(10):S1-S23.
- 31
- 32 28. Kim PJ, Attinger CE, Steinberg JS et al. Building a Multidisciplinary Hospital-Based Wound
- 33 Care Center: Nuts and Bolts. *Plast Reconstr Surg*. 2016;138(3):241S-247S.
- 34
- 35 29. Carson-Stevens A, Hibbert P, Williams H, Evans HP, Cooper A, Rees P, et al. Health Services
- 36 and Delivery Research. Characterising the nature of primary care patient safety incident reports in
- 37 the England and Wales National Reporting and Learning System: a mixed-methods agenda-setting
- 38 study for general practice. Southampton (UK): *NIHR Journals Library*.2016.
- 39
- 40 30. Ely JW, Kaldjian LC, D'Alessandro DM. Diagnostic errors in primary care: lessons learned. *J*
- 41 *Am Board Fam Med*. 2012;25(1):87-97.
- 42
- 43 31. Norman GR, Eva KW. Diagnostic error and clinical reasoning. *Med Educ*. 2010;44(1):94-100.
- 44
- 45 32. Graber ML, Franklin N, Gordon R. Diagnostic error in internal medicine. *Arch Intern Med*.
- 46 2005;165(13):1493-9.
- 47
- 48 33. Schiff GD, Hasan O, Kim S et al. Diagnostic error in medicine: analysis of 583 physician-
- 49 reported errors. *Arch Intern Med*. 2009;169(20):1881-7.
- 50
- 51 34. Maude J. Differential diagnosis: the key to reducing diagnosis error, measuring diagnosis
- 52 and a mechanism to reduce healthcare costs. *Diagnosis (Berl)*. 2014;1(1):107-9.
- 53
- 54 35. Snyder RJ, Jensen J, Applewhite AJ et al. A Standardized Approach to Evaluating Lower
- 55 Extremity Chronic Wounds Using a Checklist. *Wounds*. 2019;31(5 Suppl):S29-s44.
- 56
- 57 36. Kapp S, Santamaria N. The "self-treatment of wounds for venous leg ulcers checklist"
- 58 (STOW-V Checklist V1.0): Part 1-Development, pilot and refinement of the checklist. *Int Wound J*.
- 59 2022;19(3):705-713.
- 60

- 1  
2  
3 37. Wiseman JT, Fernandes-Taylor S, Gunter R et al. Inter-rater agreement and checklist  
4 validation for postoperative wound assessment using smartphone images in vascular surgery. *J*  
5 *Vasc Surg Venous Lymphat Disord*. 2016;4(3):320-8.e2.  
6  
7 38. Kaari S, Vähätalo M, Ahmajärvi K et al. A Digital Wound Management Checklist to support  
8 clinical decision-making: a qualitative validation study. Submitted for publication.  
9  
10 39. Bond WF, Schwartz LM, Weaver KR et al. Differential diagnosis generators: an evaluation of  
11 currently available computer programs. *J Gen Intern Med*. 2012;27(2):213-9.  
12  
13 40. Riches N, Panagioti M, Alam R et al. The Effectiveness of Electronic Differential Diagnoses  
14 (DDX) Generators: A Systematic Review and Meta-Analysis. *PLoS One*. 2016;11(3):e0148991.  
15  
16 41. El-Kareh R, Hasan O, Schiff GD. Use of health information technology to reduce diagnostic  
17 errors. *BMJ Qual Saf*. 2013;22 Suppl 2(Suppl 2):ii40-ii51.  
18  
19 42. Sanders AP, Stoeldraaijers LG, Pero MW et al. Patient and professional delay in the referral  
20 trajectory of patients with diabetic foot ulcers. *Diabetes Res Clin Pract*. 2013;102(2):105-11.  
21  
22  
23  
24  
25  
26  
27  
28  
29  
30  
31  
32  
33  
34  
35  
36  
37  
38  
39  
40  
41  
42  
43  
44  
45  
46  
47  
48  
49  
50  
51  
52  
53  
54  
55  
56  
57  
58  
59  
60

Figure 1

**Diagnoses by the primary care physician**

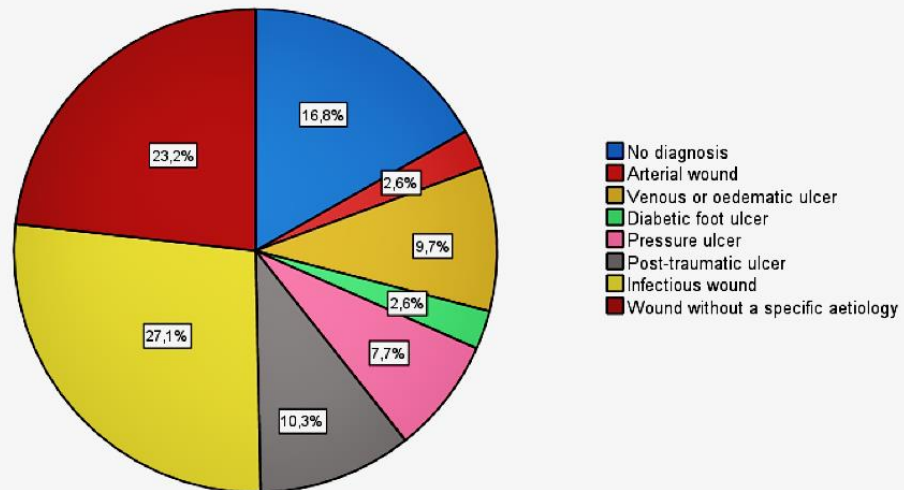

N = 155 patients visited primary care physician

**Diagnoses by the wound care team physician**

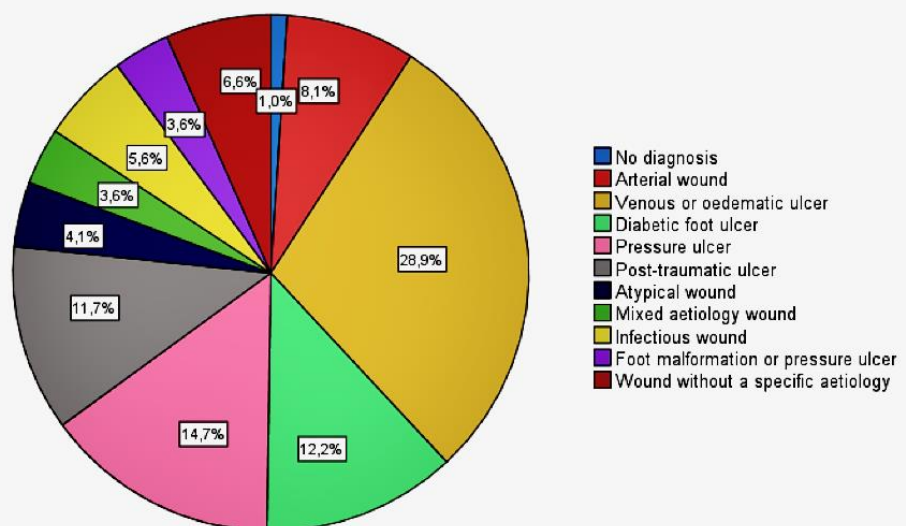

N = 197 patients visited the wound care team physician

Supplementary Table 1. Diagnostic codes included in the 10 chosen diagnostic categories.

| Category                       | no. | ICD-10 codes                                                                                                                                                                                                |
|--------------------------------|-----|-------------------------------------------------------------------------------------------------------------------------------------------------------------------------------------------------------------|
| Arterial wound                 | 1   | I70.2, L97, E10.4, E11, E11.7, E11.5, E11.4, M10, R60, S91.1, S81.8                                                                                                                                         |
| Venous or oedematous ulcer     | 2   | S81.8, S81.2, R60, R60.9, L97, I83, I83.0, I83.2, I87.2, I89.0, I88.0, R66+R60+L97                                                                                                                          |
| Diabetic ulcer                 | 3   | E11 + L97, E11.7+L97, E11.5, M20.2, M20.4, S92.5, E11.4+L97, E11.8+L97+I70.2, E11.7+S91.3, E11.5+L97, E11+G30.1, E10.7+L97, E10.6+M14.2+L97, N08.39*E11.2+L97, E10+L97, E10.6+R02+L07, E11.2+L97, E10.4+L97 |
| Pressure ulcer                 | 4   | L89, G58.7 + L97, I69.3+L89+L97                                                                                                                                                                             |
| Post-traumatic wound           | 5   | S80, T22, S81, S81.1, T24.4, T24.0, S81.8, S81.0, S81.8, T93.0, S91.0, S51.9, S01.1                                                                                                                         |
| Atypical wound                 | 6   | C44.75, C44.72, S01.3, D23.2, L90.5, T95.2, L88, K42.9, S31.3, T09.1                                                                                                                                        |
| Mixed aetiology                | 7   | I70.2+L97+I83, I70.2+R60+L97, T33.5+M86, T33.4+M86, I87.2+I70.2+E11.7+L97                                                                                                                                   |
| Infectious wound               | 8   | L02.4, L02, L02.3, L02.9, L03, L05.0, A46, L08.8, L08, L08.9, L05, L05.0, L05.9, L00, T79.3, A49.9, M86.6+L89, L30, L72, L72.0, L72.1, K61.0, K60.3, K60                                                    |
| Foot malformation/pressure     | 9   | L97, L89, I70.2 +L97, L97+M10, M05.9+L89                                                                                                                                                                    |
| Wound of unspecified aetiology | 10  | S71.0, S82.3, S91.3, S91.0, S91, S81.3, S81, S81.9, L97, S86.0, M71.1, S41.1, T13.1, L98.4, T93.0, T81.4, T81.3                                                                                             |

STROBE Statement—checklist of items that should be included in reports of observational studies

|                           | Item No. | Recommendation                                                                                                                                                                                | Page No. | Relevant text from manuscript                                                                                                                                                                                                           |
|---------------------------|----------|-----------------------------------------------------------------------------------------------------------------------------------------------------------------------------------------------|----------|-----------------------------------------------------------------------------------------------------------------------------------------------------------------------------------------------------------------------------------------|
| <b>Title and abstract</b> | 1        | (a) Indicate the study’s design with a commonly used term in the title or the abstract<br>(b) Provide in the abstract an informative and balanced summary of what was done and what was found | 5        | A cohort study                                                                                                                                                                                                                          |
| <b>Introduction</b>       |          |                                                                                                                                                                                               |          |                                                                                                                                                                                                                                         |
| Background/rationale      | 2        | Explain the scientific background and rationale for the investigation being reported                                                                                                          | 5        | Chronic wounds pose a significant burden to health care, both to the patients and to the system. Diagnostic process begins from primary care, and there should be timely diagnostic processes for patients suffering from a wound       |
| Objectives                | 3        | State specific objectives, including any prespecified hypotheses                                                                                                                              | 5        | We analysed delay in the treatment of patients with chronic wounds and analyzed also the diagnostic process among wound patients. Furthermore, we evaluated the impact of a special wound care team within primary care on this process |
| <b>Methods</b>            |          |                                                                                                                                                                                               |          |                                                                                                                                                                                                                                         |
| Study design              | 4        | Present key elements of study design early in the paper                                                                                                                                       | 6        | A cohort was collected                                                                                                                                                                                                                  |
| Setting                   | 5        | Describe the setting, locations, and relevant dates, including periods of recruitment, exposure, follow-up, and data collection                                                               | 6        | A cohort was collected in April-September 2016, in Helsinki health care centre at first visit to a wound care team and included                                                                                                         |



|    |              |   |                                                                                                                                                 |                                      |
|----|--------------|---|-------------------------------------------------------------------------------------------------------------------------------------------------|--------------------------------------|
| 1  |              |   |                                                                                                                                                 |                                      |
| 2  |              |   |                                                                                                                                                 | 197 consecutive patients. The        |
| 3  |              |   |                                                                                                                                                 | patient records were analysed        |
| 4  |              |   |                                                                                                                                                 | both backwards and onwards for       |
| 5  |              |   |                                                                                                                                                 | data collection. Data collection     |
| 6  |              |   |                                                                                                                                                 | included onset of the wound          |
| 7  |              |   |                                                                                                                                                 | until endpoint which was             |
| 8  |              |   |                                                                                                                                                 | healing. Diagnostic delays were      |
| 9  |              |   |                                                                                                                                                 | recorded by collecting the dates     |
| 10 |              |   |                                                                                                                                                 | of first visit in the health         |
| 11 |              |   |                                                                                                                                                 | services, wound care team and        |
| 12 |              |   |                                                                                                                                                 | specialist care and by collecting    |
| 13 |              |   |                                                                                                                                                 | the diagnosis found from the         |
| 14 |              |   |                                                                                                                                                 | patient record.                      |
| 15 |              |   |                                                                                                                                                 |                                      |
| 16 |              |   |                                                                                                                                                 |                                      |
| 17 |              |   |                                                                                                                                                 |                                      |
| 18 | Participants | 6 | (a) <i>Cohort study</i> —Give the eligibility criteria, and the sources and methods of selection of participants. Describe methods of follow-up | 6                                    |
| 19 |              |   | <i>Case-control study</i> —Give the eligibility criteria, and the sources and methods of case                                                   |                                      |
| 20 |              |   | ascertainment and control selection. Give the rationale for the choice of cases and controls                                                    |                                      |
| 21 |              |   | <i>Cross-sectional study</i> —Give the eligibility criteria, and the sources and methods of selection of                                        |                                      |
| 22 |              |   | participants                                                                                                                                    |                                      |
| 23 |              |   |                                                                                                                                                 | Criteria: Patients suffering for a   |
| 24 |              |   |                                                                                                                                                 | chronic wound and sent to a          |
| 25 |              |   |                                                                                                                                                 | wound care team consultation         |
| 26 |              |   |                                                                                                                                                 | within primary care at their first   |
| 27 |              |   |                                                                                                                                                 | visit there. Follow-up from          |
| 28 |              |   |                                                                                                                                                 | patient records as well as           |
| 29 |              |   |                                                                                                                                                 | gathering the data backwards         |
| 30 |              |   |                                                                                                                                                 | from the patient records until       |
| 31 |              |   |                                                                                                                                                 | the onset of the wound.              |
| 32 |              |   |                                                                                                                                                 | Additionally, demographic data,      |
| 33 |              |   |                                                                                                                                                 | the number of visits to health       |
| 34 |              |   |                                                                                                                                                 | care and earlier examinations        |
| 35 |              |   |                                                                                                                                                 | were collected. The diagnoses        |
| 36 |              |   |                                                                                                                                                 | set at the first visit, at the wound |
| 37 |              |   |                                                                                                                                                 | care team and at the specialist      |
| 38 |              |   |                                                                                                                                                 | care visit were compared.            |
| 39 |              |   | (b) <i>Cohort study</i> —For matched studies, give matching criteria and number of exposed and                                                  |                                      |
| 40 |              |   | unexposed                                                                                                                                       |                                      |
| 41 |              |   |                                                                                                                                                 |                                      |
| 42 |              |   |                                                                                                                                                 |                                      |
| 43 |              |   |                                                                                                                                                 |                                      |
| 44 |              |   |                                                                                                                                                 |                                      |
| 45 |              |   |                                                                                                                                                 |                                      |
| 46 |              |   |                                                                                                                                                 |                                      |

1  
2  
3  
4  
5  
6  
7  
8  
9  
10  
11  
12  
13  
14  
15  
16  
17  
18  
19  
20  
21  
22  
23  
24  
25  
26  
27  
28  
29  
30  
31  
32  
33  
34  
35  
36  
37  
38  
39  
40  
41  
42  
43  
44  
45  
46

For peer review only

| <i>Case-control study</i> —For matched studies, give matching criteria and the number of controls per case |    |                                                                                                                                                                                      |   |                                                                                                                                                                                                                                                                                                                                   |
|------------------------------------------------------------------------------------------------------------|----|--------------------------------------------------------------------------------------------------------------------------------------------------------------------------------------|---|-----------------------------------------------------------------------------------------------------------------------------------------------------------------------------------------------------------------------------------------------------------------------------------------------------------------------------------|
| Variables                                                                                                  | 7  | Clearly define all outcomes, exposures, predictors, potential confounders, and effect modifiers. Give diagnostic criteria, if applicable                                             | 6 | For delay article we examined the dates and diagnostic codes of each visit for a physician in the health care system throughout the clinical treatment path. We examined how the ICD-codes differentiated between physicians' and which diagnostic procedures and tests or treatment was used to determine the correct diagnosis. |
| Data sources/<br>measurement                                                                               | 8* | For each variable of interest, give sources of data and details of methods of assessment (measurement). Describe comparability of assessment methods if there is more than one group | 6 | Data collected from the patient records.                                                                                                                                                                                                                                                                                          |
| Bias                                                                                                       | 9  | Describe any efforts to address potential sources of bias                                                                                                                            | 8 | Potential bias is the variation of the diagnostic codes, ICD-10, as the diagnostic procedures varied remarkably. We have explained in the article how we decided the date of the correct diagnosis. Also outliers constitute a possible bias. Some had been suffering from a wound for years and/or the wound never healed.       |
| Study size                                                                                                 | 10 | Explain how the study size was arrived at                                                                                                                                            | 6 | We collected 197 patients: No power estimates have been done.                                                                                                                                                                                                                                                                     |

Continued on next page

|    |                |     |                                                                                                     |       |                                       |
|----|----------------|-----|-----------------------------------------------------------------------------------------------------|-------|---------------------------------------|
| 1  |                |     |                                                                                                     |       |                                       |
| 2  | Quantitative   | 11  | Explain how quantitative variables were handled in the analyses. If applicable, describe which      | 6     | We removed patients who had           |
| 3  | variables      |     | groupings were chosen and why                                                                       |       | wounds over 365 days prior the        |
| 4  |                |     |                                                                                                     |       | wound care team visit from the        |
| 5  |                |     |                                                                                                     |       | delay analyses, but included them     |
| 6  |                |     |                                                                                                     |       | in the descriptive analyses for basic |
| 7  |                |     |                                                                                                     |       | demography.                           |
| 8  |                |     |                                                                                                     |       |                                       |
| 9  |                |     |                                                                                                     |       |                                       |
| 10 | Statistical    | 12  | (a) Describe all statistical methods, including those used to control for confounding               | 11,19 | We were using SPSS for statistical    |
| 11 | methods        |     |                                                                                                     |       | analysis. Descriptives and            |
| 12 |                |     |                                                                                                     |       | Frequencies, Explore, Means were      |
| 13 |                |     |                                                                                                     |       | used. Two-Independent Samples         |
| 14 |                |     |                                                                                                     |       | Test were used.                       |
| 15 |                |     |                                                                                                     |       |                                       |
| 16 |                |     | (b) Describe any methods used to examine subgroups and interactions                                 | 11,19 | Two-Independent Samples Test          |
| 17 |                |     |                                                                                                     |       | were used, (Mann-Whitney-U test )     |
| 18 |                |     |                                                                                                     |       | when comparing the subgroups and      |
| 19 |                |     |                                                                                                     |       | differences in delays between them    |
| 20 |                |     |                                                                                                     |       | and Pearsons chii-square and          |
| 21 |                |     |                                                                                                     |       | ANOVA-tests when comparing            |
| 22 |                |     |                                                                                                     |       | subgroups of male and female in       |
| 23 |                |     |                                                                                                     |       | background descriptives               |
| 24 |                |     |                                                                                                     |       |                                       |
| 25 |                |     |                                                                                                     |       |                                       |
| 26 |                |     | (c) Explain how missing data were addressed                                                         |       | Not much missing data. We             |
| 27 |                |     |                                                                                                     |       | analysed the groups and removed       |
| 28 |                |     |                                                                                                     |       | the outliers from delay analyses.     |
| 29 |                |     |                                                                                                     |       |                                       |
| 30 |                |     | (d) <i>Cohort study</i> —If applicable, explain how loss to follow-up was addressed                 |       | No loss to follow-up                  |
| 31 |                |     | <i>Case-control study</i> —If applicable, explain how matching of cases and controls was addressed  |       |                                       |
| 32 |                |     | <i>Cross-sectional study</i> —If applicable, describe analytical methods taking account of sampling |       |                                       |
| 33 |                |     | strategy                                                                                            |       |                                       |
| 34 |                |     |                                                                                                     |       |                                       |
| 35 |                |     | (e) Describe any sensitivity analyses                                                               |       |                                       |
| 36 |                |     |                                                                                                     |       |                                       |
| 37 | <b>Results</b> |     |                                                                                                     |       |                                       |
| 38 | Participants   | 13* | (a) Report numbers of individuals at each stage of study—eg numbers potentially eligible, examined  | 8     | 197 patients included in the study    |
| 39 |                |     | for eligibility, confirmed eligible, included in the study, completing follow-up, and analysed      |       | 182 patients in the delay analyses    |
| 40 |                |     |                                                                                                     |       |                                       |
| 41 |                |     |                                                                                                     |       |                                       |
| 42 |                |     |                                                                                                     |       |                                       |
| 43 |                |     |                                                                                                     |       |                                       |
| 44 |                |     |                                                                                                     |       |                                       |
| 45 |                |     |                                                                                                     |       |                                       |
| 46 |                |     |                                                                                                     |       |                                       |

|                  |     |                                                                                                                                          |         |                                                                                                                                                                                                                                                                                                                                                                                                                                  |
|------------------|-----|------------------------------------------------------------------------------------------------------------------------------------------|---------|----------------------------------------------------------------------------------------------------------------------------------------------------------------------------------------------------------------------------------------------------------------------------------------------------------------------------------------------------------------------------------------------------------------------------------|
|                  |     | (b) Give reasons for non-participation at each stage                                                                                     | 6       | Excluded from the delay analyses patients which had onset of the wound over 365 days prior the wound care team visit.                                                                                                                                                                                                                                                                                                            |
|                  |     | (c) Consider use of a flow diagram                                                                                                       |         |                                                                                                                                                                                                                                                                                                                                                                                                                                  |
| Descriptive data | 14* | (a) Give characteristics of study participants (eg demographic, clinical, social) and information on exposures and potential confounders | 9-11,13 | Characteristic are found in the table 1–3                                                                                                                                                                                                                                                                                                                                                                                        |
|                  |     | (b) Indicate number of participants with missing data for each variable of interest                                                      | 11      | Missing data: fP-Gluk n=4, HbA1c n=44, LDL n=28, BMI n=19, ABI primary care n=179, ABI wound care team n=86                                                                                                                                                                                                                                                                                                                      |
|                  |     | (c) Cohort study—Summarise follow-up time (eg, average and total amount)                                                                 |         | Follow-up from the first visit in the wound care team for until wound healing or 365days.                                                                                                                                                                                                                                                                                                                                        |
| Outcome data     | 15* | Cohort study—Report numbers of outcome events or summary measures over time                                                              | 18,19   | Delays are presented in Median days ( IQR;Min-Max;Range)<br><b>Patient-related delay</b> 2(0-14;0-351;351), From onset of the wound to first physician evaluation 8(1-32;0-314;314), From onset of the wound to wound care team( <b>diagnostic delay</b> ) 57(33-101;2-358;356), From the first contact to wound care team( <b>organizational delay</b> ) 42(22-80;1-484;483) wound care team to specialist 21(7-52;-58-252;414) |
|                  |     | Case-control study—Report numbers in each exposure category, or summary measures of exposure                                             |         |                                                                                                                                                                                                                                                                                                                                                                                                                                  |
|                  |     | Cross-sectional study—Report numbers of outcome events or summary measures                                                               |         |                                                                                                                                                                                                                                                                                                                                                                                                                                  |

|    |                        |    |                                                                                                           |       |
|----|------------------------|----|-----------------------------------------------------------------------------------------------------------|-------|
| 1  |                        |    |                                                                                                           |       |
| 2  | Main results           | 16 | (a) Give unadjusted estimates and, if applicable, confounder-adjusted estimates and their precision       | 18,19 |
| 3  |                        |    | (eg, 95% confidence interval). Make clear which confounders were adjusted for and why they were           |       |
| 4  |                        |    | included                                                                                                  |       |
| 5  |                        |    |                                                                                                           |       |
| 6  |                        |    |                                                                                                           |       |
| 7  |                        |    |                                                                                                           |       |
| 8  |                        |    |                                                                                                           |       |
| 9  |                        |    |                                                                                                           |       |
| 10 |                        |    |                                                                                                           |       |
| 11 |                        |    | (b) Report category boundaries when continuous variables were categorized                                 |       |
| 12 |                        |    | (c) If relevant, consider translating estimates of relative risk into absolute risk for a meaningful time |       |
| 13 |                        |    | period                                                                                                    |       |
| 14 |                        |    |                                                                                                           |       |
| 15 | Continued on next page |    |                                                                                                           |       |
| 16 |                        |    |                                                                                                           |       |
| 17 |                        |    |                                                                                                           |       |
| 18 |                        |    |                                                                                                           |       |
| 19 |                        |    |                                                                                                           |       |
| 20 |                        |    |                                                                                                           |       |
| 21 |                        |    |                                                                                                           |       |
| 22 |                        |    |                                                                                                           |       |
| 23 |                        |    |                                                                                                           |       |
| 24 |                        |    |                                                                                                           |       |
| 25 |                        |    |                                                                                                           |       |
| 26 |                        |    |                                                                                                           |       |
| 27 |                        |    |                                                                                                           |       |
| 28 |                        |    |                                                                                                           |       |
| 29 |                        |    |                                                                                                           |       |
| 30 |                        |    |                                                                                                           |       |
| 31 |                        |    |                                                                                                           |       |
| 32 |                        |    |                                                                                                           |       |
| 33 |                        |    |                                                                                                           |       |
| 34 |                        |    |                                                                                                           |       |
| 35 |                        |    |                                                                                                           |       |
| 36 |                        |    |                                                                                                           |       |
| 37 |                        |    |                                                                                                           |       |
| 38 |                        |    |                                                                                                           |       |
| 39 |                        |    |                                                                                                           |       |
| 40 |                        |    |                                                                                                           |       |
| 41 |                        |    |                                                                                                           |       |
| 42 |                        |    |                                                                                                           |       |
| 43 |                        |    |                                                                                                           |       |
| 44 |                        |    |                                                                                                           |       |
| 45 |                        |    |                                                                                                           |       |
| 46 |                        |    |                                                                                                           |       |

Continued on next page

|    |                   |    |                                                                                                                                                                            |    |                                       |
|----|-------------------|----|----------------------------------------------------------------------------------------------------------------------------------------------------------------------------|----|---------------------------------------|
| 1  |                   |    |                                                                                                                                                                            |    |                                       |
| 2  | Other analyses    | 17 | Report other analyses done—eg analyses of subgroups and interactions, and sensitivity analyses                                                                             | 14 | 21.3% out of 197 were not seen by     |
| 3  |                   |    |                                                                                                                                                                            |    | primary care physician. Of those      |
| 4  |                   |    |                                                                                                                                                                            |    | who met the physician, the            |
| 5  |                   |    |                                                                                                                                                                            |    | diagnosis was recorded in 129         |
| 6  |                   |    |                                                                                                                                                                            |    | cases. The diagnosis was consistent   |
| 7  |                   |    |                                                                                                                                                                            |    | with the diagnosis of the wound       |
| 8  |                   |    |                                                                                                                                                                            |    | care team was in 59 cases.            |
| 9  |                   |    |                                                                                                                                                                            |    |                                       |
| 10 |                   |    |                                                                                                                                                                            |    |                                       |
| 11 | <b>Discussion</b> |    |                                                                                                                                                                            |    |                                       |
| 12 | Key results       | 18 | Summarise key results with reference to study objectives                                                                                                                   | 21 | Key results are: the delay for        |
| 13 |                   |    |                                                                                                                                                                            |    | correct diagnosis is median 57 days   |
| 14 |                   |    |                                                                                                                                                                            |    | from the onset of the wound,          |
| 15 |                   |    |                                                                                                                                                                            |    | whereas optimate wound diagnosis      |
| 16 |                   |    |                                                                                                                                                                            |    | should occur in 14 days.              |
| 17 |                   |    |                                                                                                                                                                            |    | The delay is organizational (and      |
| 18 |                   |    |                                                                                                                                                                            |    | diagnostical) since the first         |
| 19 |                   |    |                                                                                                                                                                            |    | physician contact is median 8 days    |
| 20 |                   |    |                                                                                                                                                                            |    | from the onset of the wound and       |
| 21 |                   |    |                                                                                                                                                                            |    | there was a minimum patient-          |
| 22 |                   |    |                                                                                                                                                                            |    | related delay.                        |
| 23 |                   |    |                                                                                                                                                                            |    |                                       |
| 24 |                   |    |                                                                                                                                                                            |    |                                       |
| 25 |                   |    |                                                                                                                                                                            |    |                                       |
| 26 | Limitations       | 19 | Discuss limitations of the study, taking into account sources of potential bias or imprecision. Discuss both direction and magnitude of any potential bias                 | 23 | The same as in Bias- section.         |
| 27 |                   |    |                                                                                                                                                                            |    | Also one limitation might be          |
| 28 |                   |    |                                                                                                                                                                            |    | selection bias, when all patients are |
| 29 |                   |    |                                                                                                                                                                            |    | sent to a consultation. Additionally, |
| 30 |                   |    |                                                                                                                                                                            |    | there was not a comparison group      |
| 31 |                   |    |                                                                                                                                                                            |    | (patients with chronic wounds and     |
| 32 |                   |    |                                                                                                                                                                            |    | not possibilities for a wound care    |
| 33 |                   |    |                                                                                                                                                                            |    | team consultation/before the          |
| 34 |                   |    |                                                                                                                                                                            |    | establishment of the team).           |
| 35 |                   |    |                                                                                                                                                                            |    |                                       |
| 36 |                   |    |                                                                                                                                                                            |    |                                       |
| 37 | Interpretation    | 20 | Give a cautious overall interpretation of results considering objectives, limitations, multiplicity of analyses, results from similar studies, and other relevant evidence | 23 | This study describes the diagnostic   |
| 38 |                   |    |                                                                                                                                                                            |    | processes and delays of patients      |
| 39 |                   |    |                                                                                                                                                                            |    | with wounds in Helsinki               |
| 40 |                   |    |                                                                                                                                                                            |    |                                       |
| 41 |                   |    |                                                                                                                                                                            |    |                                       |
| 42 |                   |    |                                                                                                                                                                            |    |                                       |

|    |                          |    |                                                                                                                                                               |                                       |
|----|--------------------------|----|---------------------------------------------------------------------------------------------------------------------------------------------------------------|---------------------------------------|
| 1  |                          |    |                                                                                                                                                               |                                       |
| 2  |                          |    |                                                                                                                                                               | metropolitan area. Our conclusion     |
| 3  |                          |    |                                                                                                                                                               | and suggestion is, that it is         |
| 4  |                          |    |                                                                                                                                                               | beneficial to organize wound care     |
| 5  |                          |    |                                                                                                                                                               | teams in the firstline in the primary |
| 6  |                          |    |                                                                                                                                                               | care to detect as soon as possible    |
| 7  |                          |    |                                                                                                                                                               | the wounds and to start optimal care  |
| 8  |                          |    |                                                                                                                                                               | for these patients. Avoiding delays   |
| 9  |                          |    |                                                                                                                                                               | and erroneous diagnosis is essential  |
| 10 |                          |    |                                                                                                                                                               | in avoiding patient harm and costs.   |
| 11 |                          |    |                                                                                                                                                               |                                       |
| 12 |                          |    |                                                                                                                                                               |                                       |
| 13 | Generalisability         | 21 | Discuss the generalisability (external validity) of the study results                                                                                         | 23                                    |
| 14 |                          |    |                                                                                                                                                               | This study provides a model for the   |
| 15 |                          |    |                                                                                                                                                               | primary care; how to make wound       |
| 16 |                          |    |                                                                                                                                                               | care safer for the patients with a    |
| 17 |                          |    |                                                                                                                                                               | little effort, team education, re-    |
| 18 |                          |    |                                                                                                                                                               | organization and support from the     |
| 19 |                          |    |                                                                                                                                                               | specialist care. Similar teams could  |
| 20 |                          |    |                                                                                                                                                               | be arranged anywhere in primary       |
| 21 |                          |    |                                                                                                                                                               | care.                                 |
| 22 |                          |    |                                                                                                                                                               |                                       |
| 23 |                          |    |                                                                                                                                                               |                                       |
| 24 | <b>Other information</b> |    |                                                                                                                                                               |                                       |
| 25 | Funding                  | 22 | Give the source of funding and the role of the funders for the present study and, if applicable, for the original study on which the present article is based | 24                                    |
| 26 |                          |    |                                                                                                                                                               | Funding is for Kirsti Ahmajärvi ,     |
| 27 |                          |    |                                                                                                                                                               | responsible author, from the          |
| 28 |                          |    |                                                                                                                                                               | University of Helsinki to work        |
| 29 |                          |    |                                                                                                                                                               | some months as PhD Student(“out-      |
| 30 |                          |    |                                                                                                                                                               | of office”-vacations for studies)     |
| 31 |                          |    |                                                                                                                                                               | Also Grants for a couple of months    |
| 32 |                          |    |                                                                                                                                                               | from non-profital organizations to    |
| 33 |                          |    |                                                                                                                                                               | support the PhD work (“out-of-        |
| 34 |                          |    |                                                                                                                                                               | office”-vacations supports)           |
| 35 |                          |    |                                                                                                                                                               | The Finnish Wound Association         |
| 36 |                          |    |                                                                                                                                                               | and The Finnish Association for       |
| 37 |                          |    |                                                                                                                                                               | General Practice                      |
| 38 |                          |    |                                                                                                                                                               |                                       |
| 39 |                          |    |                                                                                                                                                               |                                       |
| 40 |                          |    |                                                                                                                                                               |                                       |
| 41 |                          |    |                                                                                                                                                               |                                       |
| 42 |                          |    |                                                                                                                                                               |                                       |
| 43 |                          |    |                                                                                                                                                               |                                       |
| 44 |                          |    |                                                                                                                                                               |                                       |
| 45 |                          |    |                                                                                                                                                               |                                       |
| 46 |                          |    |                                                                                                                                                               |                                       |

1  
2  
3  
4  
5  
6  
7  
8  
9  
10  
11  
12  
13  
14  
15  
16  
17  
18  
19  
20  
21  
22  
23  
24  
25  
26  
27  
28  
29  
30  
31  
32  
33  
34  
35  
36  
37  
38  
39  
40  
41  
42  
43  
44  
45  
46

\*Give information separately for cases and controls in case-control studies and, if applicable, for exposed and unexposed groups in cohort and cross-sectional studies.

**Note:** An Explanation and Elaboration article discusses each checklist item and gives methodological background and published examples of transparent reporting. The STROBE checklist is best used in conjunction with this article (freely available on the Web sites of PLoS Medicine at <http://www.plosmedicine.org/>, Annals of Internal Medicine at <http://www.annals.org/>, and Epidemiology at <http://www.epidem.com/>). Information on the STROBE Initiative is available at [www.strobe-statement.org](http://www.strobe-statement.org).

For peer review only
