# Supplementary material for: Cohort study of diagnostic delay in the clinical pathway of patients with chronic wounds in the primary care setting
Source: PubMed Central journal article supplement — BMJ Open. 2022 Nov 21;12(11):e062673. doi: 10.1136/bmjopen-2022-062673 (PMC9680184; doi:10.1136/bmjopen-2022-062673), 2022-11-21
Supplement: bmjopen-2022-062673supp001.pdf [file bmjopen-2022-062673supp001.pdf]

Supplementary Table 1. Diagnostic codes included in the 10 chosen diagnostic categories.

| Category                       | no. | ICD-10 codes                                                                                                                                                                                                |
|--------------------------------|-----|-------------------------------------------------------------------------------------------------------------------------------------------------------------------------------------------------------------|
| Arterial wound                 | 1   | I70.2, L97, E10.4, E11, E11.7, E11.5, E11.4, M10, R60, S91.1, S81.8                                                                                                                                         |
| Venous or oedematous ulcer     | 2   | S81.8, S81.2, R60, R60.9, L97, I83, I83.0, I83.2, I87.2, I89.0, I88.0, R66+R60+L97                                                                                                                          |
| Diabetic ulcer                 | 3   | E11 + L97, E11.7+L97, E11.5, M20.2, M20.4, S92.5, E11.4+L97, E11.8+L97+I70.2, E11.7+S91.3, E11.5+L97, E11+G30.1, E10.7+L97, E10.6+M14.2+L97, N08.39*E11.2+L97, E10+L97, E10.6+R02+L07, E11.2+L97, E10.4+L97 |
| Pressure ulcer                 | 4   | L89, G58.7 + L97, I69.3+L89+L97                                                                                                                                                                             |
| Post-traumatic wound           | 5   | S80, T22, S81, S81.1, T24.4, T24.0, S81.8, S81.0, S81.8, T93.0, S91.0, S51.9, S01.1                                                                                                                         |
| Atypical wound                 | 6   | C44.75, C44.72, S01.3, D23.2, L90.5, T95.2, L88, K42.9, S31.3, T09.1                                                                                                                                        |
| Mixed aetiology                | 7   | I70.2+L97+I83, I70.2+R60+L97, T33.5+M86, T33.4+M86, I87.2+I70.2+E11.7+L97                                                                                                                                   |
| Infectious wound               | 8   | L02.4, L02, L02.3, L02.9, L03, L05.0, A46, L08.8, L08, L08.9, L05, L05.0, L05.9, L00, T79.3, A49.9, M86.6+L89, L30, L72, L72.0, L72.1, K61.0, K60.3, K60                                                    |
| Foot malformation/pressure     | 9   | L97, L89, I70.2 +L97, L97+M10, M05.9+L89                                                                                                                                                                    |
| Wound of unspecified aetiology | 10  | S71.0, S82.3, S91.3, S91.0, S91, S81.3, S81, S81.9, L97, S86.0, M71.1, S41.1, T13.1, L98.4, T93.0, T81.4, T81.3                                                                                             |
